1 **Title**

2 The AusTraits Plant Dictionary

3

4 **Authors**

5 Elizabeth H. Wenk<sup>1</sup>

6 Hervé Sauquet<sup>1,2</sup>

7 Rachael V. Gallagher<sup>3</sup>

8 Rowan Brownlee<sup>4</sup>

9 Carl Boettiger<sup>5</sup>

10 David Coleman<sup>3</sup>

11 Sophie Yang<sup>1</sup>

12 Tony Auld<sup>1,6,7</sup>

13 Russell Barrett<sup>1,2</sup>

14 Timothy Brodribb<sup>8</sup>

15 Brendan Choat<sup>3</sup>

16 Lily Dun<sup>3</sup>

17 David Ellsworth<sup>3</sup>

18 Carl Gosper<sup>9</sup>

19 Lydia Guja<sup>10, 11</sup>

20 Gregory J. Jordan<sup>8</sup>

21 Tom Le Breton<sup>1</sup>

22 Andrea Leigh<sup>12</sup>

23 Patricia Lu-Irving<sup>2</sup>

24 Belinda Medlyn<sup>3</sup>

25 Rachael Nolan<sup>3</sup>

26 Mark Ooi<sup>1</sup>

27 Karen D. Sommerville<sup>2</sup>

28 Peter Vesk<sup>13</sup>

29 Mathew White<sup>14</sup>

30 Ian J. Wright<sup>3, 15</sup>

31 Daniel S. Falster<sup>1</sup>

32

33 Affiliations

34 1. Evolution & Ecology Research Centre, University of New South Wales

35 2. Royal Botanic Garden and Domain Trust, Sydney

1

- 36 3. Hawkesbury Institute for the Environment, Western Sydney University
- 37 4. Australian Research Data Commons
- 38 5. Department of Environmental Science, Policy, & Management, University of California,
- 39 Berkeley
- 40 6. NSW Department of Planning and Environment
- 41 7. University of Wollongong
- 42 8. Department of Biological Sciences, University of Tasmania
- 43 9. Department of Biodiversity, Conservation and Attractions, Western Australia
- 44 10. Centre for Australian National Biodiversity Research
- 45 11. National Seed Bank, Australian National Botanic Gardens, Department of Department of
- 46 Climate Change, Energy, the Environment and Water
- 47 12. School of Life Sciences, University of Technology Sydney
- 48 13. School of BioSciences, University of Melbourne
- 49 14. Victorian Department of Energy, Environment and Climate Action
- 50 15. School of Natural Sciences, Macquarie University

51

52 corresponding author(s): Elizabeth Wenk (ehwenk@gmail.com)

53

54

## 55 **Abstract**

56 Traits with intuitive names, a clear scope and explicit description are essential for all trait  
57 databases. Reanalysis of data from a single database, or analyses that integrate data across  
58 multiple databases, can only occur if researchers are confident the trait concepts are  
59 consistent within and across sources. The lack of a unified, comprehensive resource for plant  
60 trait definitions has previously limited the utility of trait databases. Here we describe the  
61 AusTraits Plant Dictionary (APD), which extends the trait definitions included in the new trait  
62 database AusTraits. The development process of the APD included three steps: review and  
63 formalisation of the scope of each trait and the accompanying trait description; addition of  
64 trait meta-data; and publication in both human and machine-readable forms. Trait  
65 definitions include keywords, references and links to related trait concepts in other  
66 databases, and the traits are grouped into a hierarchy for easy searching. As well as  
67 improving the usability of AusTraits, the Dictionary will foster the integration of trait data  
68 across global and regional plant trait databases.

69

## 70 **Background & Summary**

71 Large-scale analyses of trait data are now commonplace across many scientific disciplines,  
72 from vegetation modelling, to evolutionary dynamics and conservation planning<sup>1,2</sup>. At the  
73 broadest level, a trait is any morphological, physiological, chemical, or life history feature of  
74 an organism that can be documented<sup>3</sup>. Traits capture the enormous heterogeneity in form  
75 and function across individuals, populations, or taxonomic units. Variation in trait values  
76 reflects the ecological and evolutionary processes that give rise to functional diversity and, in  
77 turn, is thus used to define and describe units of biodiversity (e.g., species)<sup>4</sup>. For vascular  
78 plants, the increasing integration of big trait datasets into studies of plant ecology and  
79 evolution can be attributed to the rapid growth in databases that collate and/or harmonise  
80 collections of field-based observations for re-use<sup>5</sup>. Some plant trait databases are global<sup>6-8</sup>,  
81 while others have regional<sup>9-12</sup> or taxonomic<sup>13</sup> scopes. Some target specific organs or  
82 functions<sup>14</sup>, and others are more general, such as floras aimed at plant identification<sup>15</sup>.  
83 Combined with the growing interest in plant traits, the surge in available data is expanding  
84 our ability to answer a wide range of questions about the global flora<sup>6,16</sup>.

85 Usefully and accurately capturing the wonderful diversity of plant form and function to  
86 address ecological, biogeographic and evolutionary questions involves the non-trivial  
87 challenge of reconciling many and often conflicting definitions of plant traits. Garnier<sup>17</sup> wrote  
88 of the “semantic bazaar” in trait ecology, referring to the diversity of possible meanings for a  
89 single trait name. For instance, does plant height refer to vegetative height or the height of  
90 the highest inflorescence, the height of a typical adult or that of the tallest individual? Is leaf  
91 length the length of the leaf blade or does it include petiole length? Without definitions, data  
92 cannot be easily reused or merged across trait databases, as the trait names by themselves  
93 might not clearly indicate the “trait concept”<sup>5</sup>. Moreover, as each researcher sees the  
94 diversity of form and function in the natural world through a unique lens, the same physical  
95 feature on the same plant may be scored as being part of different trait concepts or given a  
96 different value of the same trait (Figure 1).

97 Ideally, the relationships between different phenotypes and terms would be standardised,  
98 allowing researchers to easily reuse data in new contexts. Just as a taxon concept can be  
99 described as “a circumscribed set of organisms” (<https://github.com/tdwg/tnc/issues/1>), a  
100 trait concept delimits a collection of trait values pertaining to a distinct characteristic of a  
101 specific part of an organism (cell, tissue, organ, or whole organism). Trait names, like taxon  
102 names, are associated with each concept, attaching a reusable, interpretable label to each  
103 concept, but like taxon names require common terminology across research groups.

104 Currently, research is hindered by the lack of explicit definitions outlining what trait concept  
105 a particular trait name refers to, what measurements a specific trait concept encompasses,  
106 and the difficulty of reconciling many plausible terms for a single phenotype.

107 As efforts towards data compilation and database integration have progressed, the need for  
108 explicit definitions is increasingly being recognised. Explicit, widely-adopted schemes have  
109 long existed for just a few traits (e.g. Raunkiaer's life forms)<sup>17</sup> and plant morphology books  
110 have long offered a rich vocabulary to describe plant parts<sup>18,19</sup>. Meanwhile, trait handbooks  
111 have emerged in the ecology and evolutionary biology literature as tools for standardising  
112 measurements and terminology<sup>21–26</sup>. Individual trait databases are also increasingly  
113 incorporating explicit trait definitions, enumerating allowable categorical trait values and  
114 linking their trait definitions to trait handbooks or published trait ontologies (Table 1)<sup>7,10,17,27–</sup>  
115 <sup>29</sup>. The Thesaurus Of Plant Characteristics (TOP; <https://top-thesaurus.org/>)<sup>17</sup> was an  
116 initiative to define trait concepts for traits in the TRY plant trait database (Table 1)<sup>6</sup>. Still a  
117 work in progress, it was the first extensive effort to publish ecological plant trait definitions  
118 that included expected units, allowable categorical trait values and references. There also  
119 exist more formal vocabularies put forward by the Open Biological and Biomedical Ontology  
120 Foundry (OBO; <https://obofoundry.org>). One of the OBO Foundry ontologies, the Plant Trait  
121 Ontology (PTO; <https://biportal.bioontology.org/ontologies/PTO>; Table 1)<sup>30</sup>, was the first  
122 extensive formal ontology of plant traits to be published, including definitions for hundreds  
123 of traits relevant to agricultural research organised into an intuitive hierarchy. EnvThes  
124 likewise offers a formally published ontology to support Long Term Ecological Research  
125 (LTER) data (<https://vocabs.lter-europe.net/envthes/>; Table 1)<sup>32</sup> and is focused on ecological  
126 traits. All these pioneering assemblies of trait definitions have advanced global integration of  
127 plant trait definitions, but these works remain incomplete relative to the breadth of trait  
128 concepts captured by large trait databases.

129 Meanwhile, the core components that must be encapsulated to fully define a trait concept  
130 have been established by emerging standards in bioinformatic platforms. They include the  
131 trait's name (label), a concise but explicit description, standard units (for numeric traits) and  
132 allowable range (for numeric traits) or literal values (for categorical traits)<sup>29,32–34</sup>. Additional  
133 fields to enhance trait findability include keywords and a trait hierarchy. Interoperability and  
134 reusability are increased by including references and links to identical or similar traits in  
135 other trait databases. A further step toward making trait definitions FAIR (Findable,  
136 Accessible, Interoperable, Reproducible)<sup>35</sup> is to explicitly link each trait name to a published  
137 trait definition<sup>29</sup> and to publish a machine-readable trait ontology that accompanies a  
138 database or research project.

139 Despite these multiple efforts from multiple groups, the research community currently lacks  
140 comprehensive compilations of definitions that can be readily applied to new data. The  
141 existing trait dictionaries, thesauri, and ontologies (Table 1) document an insufficient  
142 breadth of traits or offer only partial trait definitions, omitting information such as defined  
143 allowable categorical trait values and preferred units, limiting their reuse. For example, we  
144 could not find an existing dictionary that contained a definition for a sufficient diversity of  
145 traits, with enough detail, or in machine readable format, to support usage of the new  
146 AusTraits database. AusTraits is a large continental plant trait database, that currently  
147 includes more than 1.25 million data records (v4.1.0) spanning more than 500 traits and  
148 nearly all of Australia's 26,000 plant species<sup>11</sup>. It includes data for a broad selection of traits  
149 including those related to plant morphology, fire ecology, life history, plant physiology, and  
150 nutrient contents. The AusTraits workflow requires each trait concept to be linked to  
151 allowable trait values, allowable ranges, and accepted units. As the project could not reuse  
152 an existing resource, AusTraits developed its own trait dictionary, which is available on the  
153 project's GitHub repository (<https://github.com/traitecoevo/austraits.build>) and as a data

154 object embedded within the trait database (Figure 2). The traits initially had informal  
155 definitions, developed by the AusTraits team, which referenced published trait handbooks,  
156 other reference books or an existing thesaurus or glossary, if available, or else were  
157 developed in conversation with researchers who contributed data for a unique trait to the  
158 database. This process allowed the database to expand rapidly and efficiently, without being  
159 limited by availability of dictionaries, whilst still documenting trait definitions, preferred  
160 units, numeric ranges and allowable categorical trait values for all traits in the database.  
161 While these definitions have allowed AusTraits users to accurately interpret all data within  
162 the database and to manually link AusTraits data to those in other trait databases, it was  
163 apparent that the utility of AusTraits would be further enhanced by harmonising trait  
164 definitions through a formal vocabulary.

165 In this paper, we present the AusTraits Plant Dictionary (APD). This comprehensive reference  
166 for trait data in AusTraits is also a contribution intended to further integrate global plant trait  
167 databases. The APD expands the original AusTraits trait definitions into a formally published  
168 dictionary that spans the breadth of trait data included in the database. Most of these  
169 definitions will be useful in a global context and expand what is available in existing  
170 resources. We used a rigorous review process to refine trait descriptions, added additional  
171 metadata to each definition and released the trait dictionary in both a human-friendly and a  
172 machine-readable format. Our goal was to progress the global integration of plant trait data  
173 in two key ways: first, to create a resource that allowed all data within AusTraits to be  
174 effectively mapped onto semantically distinct trait concepts, enhancing the usability of  
175 AusTraits; and second, to link this information to other trait databases, thesauri, ontologies  
176 and trait handbooks, to both allow the reuse of the APD definitions and facilitate analysis of  
177 AusTraits data in combination with data from other databases.

178 The APD takes the plant trait ecology research community closer to having a global trait  
179 dictionary. In addition to supporting AusTraits, we hope that our approach of reviewing and  
180 reconciling the often-conflicting trait concepts and descriptions and making them FAIR  
181 means we have built a resource that can be reused and built upon by other research  
182 initiatives in a global context. Currently, trait concepts and categorical trait values are mostly  
183 restricted to traits and terms required to map AusTraits data, but we expect the dictionary to  
184 expand over time to support traits and trait values present in other trait databases. For  
185 instance, the APD currently has only sparse coverage of root traits, completely lacks traits  
186 pertaining to tissue decomposition rates, and is missing some key traits in the hydraulics  
187 literature. While a first version of the APD is now available, we expect to continually build  
188 upon the dictionary on the project's GitHub portal, offering successive releases. A  
189 customised GitHub issue template allows researchers from across the plant trait research  
190 community to suggest additional traits to add to this initiative. A submission would include a  
191 proposed trait concept to add, a trait label and description, allowable ranges or values, and  
192 references. Once reviewed by the AusTraits team these trait concepts could be included in  
193 future releases.

194

## 195 **Methods**

196 There were three components to building a dictionary for these traits. First, we reviewed and  
197 revised each trait concept, minimising ambiguity in its scope and writing an explicit, yet  
198 concise trait description. Second, we added metadata fields to each trait definition. Third, we  
199 compiled all trait concepts into a single resource, output simultaneously in both human and  
200 machine-readable formats.

## 201 **Reviewing and revising trait concepts, an overview**

202 **Preliminary review.** Through a preliminary review we divided all traits into three groups: 1)  
203 trait concepts that were clear and simple and could be reviewed by just the core AusTraits  
204 team; 2) trait concepts that required a brief review by experts; and 3) trait concepts where  
205 the trait's scope or allowable values required significant discussion amongst experts; these  
206 were reviewed in a series of workshops (Table 2). For the 149 traits that were the content of  
207 an element, isotope, metabolite, or other biochemical compound in a specific plant organ,  
208 tissue or cell, the meaning and scope of the trait was usually unambiguous and universally  
209 agreed upon; few of these traits required a review outside the core AusTraits team. A review  
210 by just the core AusTraits team was also sufficient for 134 additional traits with very explicit,  
211 simple definitions, or that were trait concepts linked directly to a publication and  
212 accompanying dataset.

213 **Expert reviews.** 116 physiological and floral traits were reviewed by experts with extensive  
214 experience. These reviewers were able to efficiently identify unrealistic allowable value  
215 ranges, nonstandard units, incomplete trait descriptions and call attention to missing or  
216 inappropriate key references.

217 **Workshop reviews.** 112 traits were allocated to a specialist workshop, generally because  
218 they contained long lists of synonymous or poorly defined categorical trait values or were  
219 traits measured differently by different groups of researchers. For traits that required an  
220 extensive review, we used a series of small (5–10 person) workshops that brought together  
221 researchers who would ideally apply an identical trait concept to diverse research situations.  
222 The workshops included researchers at government agencies, universities or herbaria;  
223 researchers who were functional ecologists, taxonomists or systematists; and researchers  
224 with expertise in diverse plant communities. Three workshops were conducted covering  
225 traits within the realms of 'Seed and dispersal traits' (October 2021), 'Leaf and whole plant  
226 vegetative traits' (August 2022) and 'Fire response and regeneration traits' (May 2023); each  
227 was comprised of 4 or 5 two-hour workshop sessions. Moderated by AusTraits team  
228 members, each session was dedicated to clarifying the trait concepts, refining the trait  
229 descriptions, identifying key references and carefully compiling a list of allowable trait values  
230 that was succinct and distinct. The trait workshops identified trait concepts that were too  
231 vague, trait concepts that lacked semantic clarity and curated categorical trait values.

## 232 **Completing trait definitions**

233 The core goal of all reviews was to delineate trait concepts and lists of trait values to which  
234 all data submitted to AusTraits could be unambiguously mapped. The outcomes of the  
235 workshops, expert reviews and internal reviews were used to write a trait description and  
236 propagate additional metadata for each trait concept.

237 **Trait descriptions and comments.** A clear, explicit and comprehensive trait description was  
238 drafted for each trait. Whenever possible, trait descriptions were closely aligned to those in  
239 trait handbooks, reference books, research papers describing key methods and existing trait  
240 ontologies. Following the example set by formal ontologies (e.g. the OBO Foundry ontologies  
241 PATO, PO and PTO) and the TOP Thesaurus, a second formal description was drafted for each  
242 trait where all technical terms were linked to classes (words; concepts) in published  
243 ontologies. This removed ambiguity in what was meant by a term and required that all  
244 definitions were written with reference to a narrow list of words. Although this formal  
245 method generated a unique definition for each trait, the less formal, non-annotated trait  
246 descriptions were considered essential to convey the trait concepts to users, as the encoded  
247 descriptions are often awkward to read and interpret. In addition, a comments field provided  
248 a location to document notes, including referencing similar traits, best practice  
249 measurement methods, important context variables and possible sources of error within the

250 amalgamated data. For instance, the definition for the trait “leaf area” could include a  
251 comment indicating that although only leaf area data are meant to be mapped to this trait  
252 concept, many authors will merge leaflet and leaf area data under the title “leaf area” and  
253 therefore trait databases, such that AusTraits, will contain a mix of leaf and leaflet area data  
254 under the “leaf area” trait. Meanwhile, for photosynthetic rate traits the comments field  
255 could indicate that it is best practise to document leaf temperature as a context property.

256 In addition to the trait description and comments, descriptive metadata fields were added to  
257 each trait concept (Table 3)<sup>36</sup>. The metadata fields include those required for data  
258 processing (e.g. allowable ranges and allowable trait values), those that increase trait  
259 concept findability (e.g. keywords), those that properly document the source and scope of  
260 the trait (e.g. references, reviewers) and those that increase trait concept interoperability  
261 across datasets (e.g. matches to other databases).

262 **Metadata required for processing.** The R pipeline that compiles AusTraits requires five  
263 pieces of information for each trait concept: the label (i.e., a trait name), the trait type  
264 (numeric versus categorical), the allowable range of values for numeric traits, the  
265 standardised units for numeric traits, and the allowable trait values for categorical traits  
266 (Figure 2; Table 3).

267 **Metadata to increase trait concept findability.** Metadata should also include descriptors  
268 that aid in the discovery of the resource, here the individual trait concepts. In addition to  
269 offering a trait hierarchy, APD includes three fields to increase trait findability: the plant  
270 structure being measured (e.g., stem, leaf, root, whole plant, flower), the characteristic  
271 being measured (e.g., mass, shape, force) and additional keywords (Table 3).

272 **Metadata to increase trait concept documentation.** Each trait in the APD includes metadata  
273 to record the date trait concepts were described and revised; the people involved in  
274 reviewing each trait concept and trait definition; its applicability (i.e., scope; the trait might  
275 only be scorable for specific taxonomic groups or in plants that have leaves); and past labels  
276 (names) used for the identical trait concept. In addition, references were linked to traits  
277 whenever possible; these included trait handbooks describing the trait, manuscripts  
278 introducing or championing the trait and review papers noting the best traits to measure to  
279 document a particular plant function. Two fields link the standardised units to published  
280 vocabularies, described below.

281 **Metadata to increase trait concept interoperability.** A cluster of metadata elements  
282 promote the interoperability of this resource with other databases by documenting trait  
283 concepts in other trait databases or ontologies that are identical, similar, or related to a  
284 specific trait concept in the APD (Table 3). Trait concepts from TRY<sup>6</sup>, TOP<sup>17</sup>, GIFT<sup>7</sup>, LEDA<sup>27</sup>,  
285 BIEN<sup>8</sup>, BROT 2.0<sup>10</sup>, the Palm Traits Database<sup>13</sup>, the Plant Trait Ontology<sup>30</sup> and EnvThes<sup>31</sup>  
286 were cross-mapped to trait concepts in the APD.

287 **Mapping metadata fields to concepts in published vocabularies.** In a standard tabular  
288 format, the metadata fields would be the column headers, each specifying a different piece  
289 of information documented about the trait. In a formal ontology, each metadata field  
290 included in the APD must be matched to an appropriate annotation property. These are  
291 published, formally defined terms for `label`, `description`, etc. (Table 3). By preference,  
292 metadata fields are linked to concepts defined by the often-used Simple Knowledge  
293 Organization System (SKOS; <https://www.w3.org/TR/skos-primer/>)<sup>37</sup>, Resource Description  
294 Framework (RDF; <https://www.w3.org/TR/rdf11-primer/>)<sup>38</sup>, or dcterms (Dublin Core  
295 Metadata Initiative)<sup>39</sup> vocabularies. Properties defined by the Ecological Trait-data Standard  
296 (ETS)<sup>32</sup> were also reused; this schema is establishing itself as a well-designed ecological trait  
297 database structure. Units were aligned to the Unified Code for Units of Measure (UCUM;  
298 <https://ucum.org/ucum>) standard with specific machine-readable representations of each

299 unit downloaded from the Units of Measurement (UOM) portal (<https://units-of->  
300 [measurement.org/](https://units-of-measurement.org/)). The UCUM standard follows clear, simple rules, but also has a flexible  
301 syntax for documenting notes that are recorded as part of the 'unit' for specific traits, yet are  
302 not formally units, in curly brackets<sup>40</sup>. For instance, {count}/mm<sup>2</sup> or umol{CO<sub>2</sub>}/m<sup>2</sup>/s, where  
303 the actual units are 1/mm<sup>2</sup> and umol/m<sup>2</sup>/s. An added advantage is that the UOM  
304 representations include links to identical units in a collection of other published ontologies.  
305 Properties not present in any of these ontologies were mapped to ones in the Semantic  
306 Science Information Ontology (SIO)<sup>41</sup>, the Extensible Observation Ontology (OBOE)<sup>42</sup>,  
307 Datacite<sup>43</sup> and the iAdopt Ontology<sup>44</sup> (Table 3).

308 Within each APD trait concept, some trait metadata fields were simply text strings (i.e., trait  
309 description), while other metadata values were themselves published concepts with a  
310 Uniform Resource Identifier (URI) (an inclusive term, that encompasses both URLs and  
311 Internationalized Resource Identifiers [IRIs]). For instance, references mostly have a DOI  
312 (digital object identifier), reviewers were identified by their ORCID numbers (Open  
313 Researcher and Contributor Identifier) and keywords were all identified by their URI's from  
314 various published ontologies.

## 315 **Trait hierarchy**

316 For ease of grouping trait concepts, we established a trait hierarchy into which the traits  
317 could be slotted. At the highest level, all traits within the APD could be divided into four  
318 categories: biochemical traits, morphological traits, physiological traits and life history traits  
319 (Table S1). Three of these were exact matches to classes defined by the Plant Trait Ontology  
320 (plant biochemical trait ([http://purl.obolibrary.org/obo/PTO\\_0000277](http://purl.obolibrary.org/obo/PTO_0000277)); plant morphology  
321 trait ([http://purl.obolibrary.org/obo/PTO\\_0000017](http://purl.obolibrary.org/obo/PTO_0000017)); and biological process trait,  
322 physiological process trait ([http://purl.obolibrary.org/obo/PTO\\_0000283](http://purl.obolibrary.org/obo/PTO_0000283))), while life history  
323 trait was defined within APD. Additional hierarchical levels were established, again using a  
324 combination of terms from the Plant Trait Ontology and ones defined within APD (Table S1).  
325 The trait hierarchy was mapped into the formal ontology as nested SubClasses, cascading  
326 down from the top concept, a Plant Trait ([http://purl.obolibrary.org/obo/PTO\\_0000000](http://purl.obolibrary.org/obo/PTO_0000000)).

## 327 **Building APD into a machine-readable resource**

328 The primary output for the trait concepts and their associated metadata needed to be in a  
329 machine-readable format that could both be stored on the project's GitHub repository and  
330 published online through the Australian Research Data Common's (ARDC) Research  
331 Vocabularies Australia (<https://ardc.edu.au/services/research-vocabularies-australia/>). Each  
332 term defined within the APD requires a unique and stable URI. This includes not just the trait  
333 concepts, but also the allowable categorical trait values, the trait groupings within the trait  
334 hierarchy, and the selection of terms within a glossary. Although the APD outputs are  
335 archived on the project's GitHub repository, we chose to register the APD namespace with  
336 the URI redirection service w3id.org to ensure the permanency of the URI's even if our  
337 project repository were to be moved. The trait concepts, trait groupings for the hierarchy,  
338 and allowable categorical trait values are within one schema, [w3id.org/APD/traits/](https://w3id.org/APD/traits/) while the  
339 glossary terms are in a second schema, [w3id.org/APD/glossary](https://w3id.org/APD/glossary).

340 A machine-readable representation was built using an R script that first merged seven  
341 separate data tables into a single table formatted as RDF Triples, the core unit of the  
342 Resource Description Framework (RDF) data model. With the triples format, all information  
343 content is collapsed into a single long-format document with three columns, the subject, the  
344 predicate, and the object. The subject is always the URI for a concept or term, and, for the  
345 APD, included both the URI's within the [w3id.org/APD](https://w3id.org/APD) namespace as well as concepts within  
346 the ancillary tables, such as ORCID's for reviewers, DOI's for references, or URI's for concepts



347 reused from published vocabularies. The predicate indicates a property of the object that  
348 can be described. The predicates in AusTraits are the annotation properties in Table 3 and  
349 additional terms specified under `Column` in Tables S2-S10. Each predicate is also a URI. The  
350 object is the value for the specific predicate for the specific object.

351 Spreadsheets with data that were converted to triples include: 1) the core trait concepts and  
352 their metadata; 2) trait references; 3) trait reviewers (by ORCID); 4) classes from published  
353 ontologies; 5) terms from the Units of Measurement Ontology; 6) allowable categorical trait  
354 values; 7) the trait hierarchy under which the traits in the APD could be grouped. Terms  
355 sourced from published ontologies or other sources were mapped into APD as their own  
356 entities to ensure their labels and descriptions were included within APD, rather than simply  
357 being identified by an URI. As each value of a property of an object is in a new row in triples  
358 format, there may be more than 30 rows of data for a single trait concept (Table S2), and, in  
359 total, there are more than 33,000 rows of unique object-predicate-value combinations  
360 within the APD.

361 The R package `rdflib`<sup>45</sup> was used to serialise the table of triples into RDF objects, output in  
362 Turtle (APD.ttl), N-Triple (APD.nt), N-Quad (APD.nq) and JSON Linked Data (APD.json)  
363 formats.

364 The RDF serialisations were complemented by two derivatives, created from the N-Triple  
365 output using a combination of R and Quarto scripts (Figure 4). The first is a HTML landing  
366 page for human interaction with the machine-readable formats  
367 (<https://traitecoevo.github.io/APD/index.html>) to which all searches for individual concept  
368 URIs are automatically redirected. And second is the YAML (.yml) file required by the  
369 AusTraits workflow to compile the database. It includes only the trait labels, trait description,  
370 type, allowable range, allowable trait values and required units and is located within the  
371 austraits.build GitHub repository (<https://github.com/traitecoevo/austraits.build>). The YAML  
372 format offers a flexible data serialisation format to capture diverse metadata in a single file,  
373 as it has a nested format which allows different numbers of levels beneath each header. This  
374 permits both easy data input and human interpretation.

375

## 376 **Data Records**

### 377 **Trait concepts and allowable trait values**

378 In total, APD includes 515 traits, including 112 categorical traits and 403 numeric traits (Table  
379 S3). These vary from well-known traits like leaf area to bespoke ones like leaf pendulousness  
380 that are measured only for specific research questions. The internal reviews, expert reviews  
381 and reviews through the trait workshops all worked toward clarifying trait concepts and  
382 developing clear trait descriptions and appropriate lists of allowable categorical trait values.

383 **Trait concept, label and description too vague.** The vocabulary workshops uncovered  
384 several instances where trait names were ambiguous and may have led to the  
385 misinterpretation of data. For instance, the trait 'leaf angle' was defined as the angle  
386 between the stem and the leaf blade, but it was identified that the data in AusTraits referred  
387 to the leaf blade's angle relative to the solar zenith. There are now two traits in the APD with  
388 more explicit labels and definitions, leaf axil angle and leaf inclination angle. Another  
389 example of a semantically unclear trait label was the trait capturing the hairiness of juvenile  
390 leaves. It was unclear if these were the leaves on a juvenile plant or the juvenile (regrowth)  
391 leaves on an adult plant following disturbance. Again, it was necessary to adopt two separate  
392 traits whose scopes were more explicit. In addition, by linking the terms in the trait  
393 description to ontologies, it was possible to clearly distinguish between a leaf on a 'juvenile

394 plant' ([https://purl.obolibrary.org/obo/PATO\\_0001190](https://purl.obolibrary.org/obo/PATO_0001190)) versus a 'juvenile leaf'  
395 ([https://purl.obolibrary.org/obo/PO\\_0006339](https://purl.obolibrary.org/obo/PO_0006339)) on an adult plant.

396 **Trait concept too broad.** There were several traits that were identified as being too broad  
397 and including two (or more) semantically distinct concepts; these traits were split into  
398 multiple traits with a narrower, explicitly defined scope. For instance, fruit type included  
399 both true, botanical fruit types and terms that simply indicated whether a dispersal unit was  
400 dry or fleshy. The data initially merged together under fruit type were split into a trait that  
401 captured true botanical fruit types, such as achenes and drupes<sup>46</sup> and then two traits that  
402 indicated specific functions of the fruit, independent of its formal classification, i.e., fruit  
403 fleshiness and fruit dehiscence. Plant growth form included terms that pertained not only to  
404 the actual entire plant form, but also values indicating whether it was terrestrial, aquatic, or  
405 epiphytic and whether it was a parasite. The initial scope of data mapped to plant growth  
406 form was divided into a simpler plant growth form which was focused on the plant's  
407 perennating 3-dimensional shape, with ancillary information mapped to plant growth  
408 substrate, plant succulence and, in part, a revised stem growth habit and parasitic traits  
409 (Figure 3). Trait concepts that are too broad are a global problem and other trait databases  
410 have also recently taken the approach of splitting plant growth form into more tractable  
411 traits with a clearly defined 'entity' and scope<sup>7,47</sup>. For the APD, this allowed a considerable  
412 reduction in repetitive trait values, such as remapping 'aquatic\_herbs'; 'aquatic\_shrubs' and  
413 'aquatic\_trees' to 'herbs', 'shrubs' and 'trees' under plant growth form and as 'aquatic'  
414 under plant growth substrate.

415 **Curating categorical trait values** Certain categorical traits were identified as those most  
416 requiring standardisation of trait values and were selected to review during the workshops.  
417 These included seed shape, fruit type, dispersal syndrome, leaf shape, leaf type and plant  
418 growth form. These were traits for which there were data in many datasets, but which  
419 lacked universally agreed upon allowable trait values. Despite attempts to condense terms  
420 and align meanings, AusTraits had 50–80 trait values for leaf shape; many were clearly  
421 synonymous terms or terms not actually related to the shape of the leaf blade. There were  
422 two core reasons for these long lists of terms: 1) traits that integrated data from both the  
423 ecology and the systematics communities, with different researchers favouring different sets  
424 of terms; and 2) the lack of available vocabulary to describe particular trait phenotypes.

425 Plant morphologists and taxonomists are equipped with botanical glossaries<sup>19,20,48,49</sup>, offering  
426 a detailed vocabulary to describe all nuances of a plant's morphology. In contrast, while  
427 ecologists use these morphological terms when appropriate, ecology datasets also include  
428 terms that capture specific functional roles, often using a merging of formal and informal  
429 terms. By curating categorical trait values, two core revisions were made. The first was to  
430 condense the extensive list of terms in botanical glossaries. Although many researchers in  
431 these fields take advantage of this rich descriptive vocabulary, they were amenable to  
432 reducing the list of terms allowed as values for a given trait, realising that the fine-grained  
433 distinctions were unlikely to have functional significance, but also that many terms were so  
434 similar they were unlikely to be used consistently, even by the experts. This concurs with  
435 recent research that suggests that all people, even expert botanists, were more likely to  
436 correctly identify a plant's character when there were fewer options to choose from<sup>50</sup>.  
437 Synonymous terms were listed within the description of each trait value (Table 3), clarifying  
438 the scope of each trait value retained and facilitating searches for terms that were omitted.  
439 For example, for seed surface texture, the final list included 11 trait values, but an additional  
440 28 terms were mapped as synonyms (Table 4). For some traits, appropriate lists of terms  
441 were discovered through literature searches or emerged through workshop discussions. For  
442 instance, the many leaf shape values could easily be mapped to the terms in a resource

443 established by the Systematics Association Committee 60 years ago<sup>51</sup>, which was not known  
444 to most but familiar to one workshop participant.

445 Some challenges emerged when selecting a list of allowable words to describe the ecological  
446 or functional trait values where no succinct, unified list of terms exists. The difficulty is  
447 exemplified by plant growth form, where even successive versions of the same trait  
448 handbook presented barely overlapping lists of allowable growth form terms<sup>21,22</sup>, despite this  
449 being one of the most recorded traits worldwide. These resources and many others share  
450 the use of ‘tree’, ‘shrub’ and ‘herb’, but beyond these terms resources diverge in their list of  
451 allowable plant growth form values. Our list uses terms from both of these references as well  
452 as many others<sup>7,17,47</sup>, compiling a list onto which all existing AusTraits data could be mapped.  
453 Our goal was to balance having enough terms to capture morphological and functional  
454 diversity, while allowing for comparative analyses across groupings. For plant growth form,  
455 as for other traits, this list included terms of ecological or descriptive significance that might  
456 be used only for specific taxa or ecological situations, yet were required for trait  
457 measurements in those circumstances. For the Australian flora, terms like ‘mallee’ and  
458 ‘hummock’ were deemed essential to describe distinct plant growth forms, although these  
459 terms are absent or rarely used globally. In the final list there was a clear scope and  
460 description attached to each trait value.

## 461 **Data files**

462 The APD GitHub repository (<https://github.com/traitecoevo/APD>) includes the eleven  
463 spreadsheets required to compile the final resource.

464 **APD\_traits.csv** is the core data table, which includes trait labels, trait descriptions and all  
465 associated metadata for each trait concept (Table S4). As indicated in Table 3, some columns  
466 are textual strings, others are numeric and some refer to pre-existing entities (concepts,  
467 classes). The pre-existing entities are documented in an additional four data tables,  
468 **APD\_references.csv**, **APD\_reviewers.csv**, **APD\_units.csv** and **published\_classes.csv**.

469 **APD\_references.csv** links each reference indicated in **APD\_traits.csv** to its DOI (or alternative  
470 identifier), also providing a title and complete reference (as a string) (Table S5).

471 **APD\_reviewers.csv** links each reviewer indicated in **APD\_traits.csv** to their ORCID number  
472 (Table S6).

473 **APD\_units.csv** links the standardised units indicated in **APD\_traits.csv** to their respective  
474 URLs in the Units of Measurement Ontology (Table S7). The data table includes a description  
475 of the unit, links to its SI and UCUM representation and indicates other ontologies with  
476 definitions for this unit.

477 **published\_classes.csv** documents terms from published ontologies used as keywords,  
478 measured characteristics, measured structures, or to describe the trait type. The label,  
479 description, IRI, scheme URI and scheme prefix are provided for each term (Table S8).

480 **APD\_categorical\_values.csv** contains the allowable trait values for each categorical trait,  
481 including descriptions of each term and indicating the trait concept to which the term is  
482 linked (Table S9).

483

484 A challenge in the compilation of APD was that ontologies allow only a single instance of  
485 each word to be used, with a single definition. While each trait name is unique, the same  
486 term (word) can be used as a categorical trait value for multiple traits with subtly different  
487 meanings and possibly different meanings to a pre-existing ontology. Generalising the  
488 definitions to be applicable to all instances of its use would mean that its definition would be

489 far broader than implied as a specific trait value for a single categorical trait. The solution for  
490 APD was for official trait values to be the merging of the trait label and the term, while the  
491 label for the term could be a simple word that might be reused. For instance, the trait value  
492 *hairy* is used for five separate traits and for the trait *Juvenile phase leaf hairiness* the formal  
493 trait value becomes *leaf\_hairs\_juvenile\_leaves\_hairy*.

494

495 **APD\_trait\_hierarchy.csv** indicates the hierarchical structure into which the trait concepts are  
496 mapped (Table S10).

497

498 **APD\_glossary.csv** includes a collection of terms used repeatedly within APD trait concept  
499 descriptions or as keywords, but which lacked an appropriate published definition (Table  
500 S11).

501

502 **APD\_annotation\_properties.csv** indicates the source, label and description for each of the  
503 annotation properties (Table 3) used to capture metadata for the trait concepts (Table S12).

504 **APD\_namespace\_declaration.csv** indicates the URI for each vocabulary prefix referenced in  
505 APD\_traits.csv and serves as the namespace declaration when compiling the RDF  
506 representation (Table S13).

507 **APD\_resource.csv** is already in Triples format and includes annotation properties about the  
508 core APD resources, APD/traits and APD/glossary (Table S14).

509

## 510 **Access**

511 The data are available under a CC-BY 4.0 license, allowing reuse with attribution. The  
512 versioned releases are archived on Zenodo (<https://doi.org/10.5281/zenodo.8040789>). The  
513 version controlled machine-readable Turtle representation is also published through  
514 Research Vocabularies Australia, part of the national research infrastructure operated by the  
515 Australian Research Data Commons (ARDC) (<https://vocabs.ardc.edu.au/viewById/649>). The  
516 APD GitHub repository (<https://github.com/traitecoevo/APD>) has both versioned releases  
517 and ongoing development versions. The APD namespace (w3id.org/APD) and trait concept  
518 URI's (e.g. [https://w3id.org/APD/traits/trait\\_0000014](https://w3id.org/APD/traits/trait_0000014)) also redirect to the versioned releases  
519 on the APD GitHub repository.

520

## 521 **Technical Validation**

522 The APD.ttl file (Turtle serialisation) was run through a skos validator to confirm that all  
523 relationships were consistent, all URI's were unique, and that all concepts has labels. The  
524 APD.csv (in Triples format) was used to recompile the HTML landing page. The APD\_traits.csv  
525 and APD\_categorical\_values.csv files were used to recompile the YAML file for the AusTraits  
526 workflow. Deriving the HTML output from the Turtle serialization further and confirming  
527 AusTraits continued to build properly from the automatically regenerated YAML file,  
528 confirmed the files were complete and the process was accurate.

529

## 530 **Code Availability**

531 The code to compile the data into the selected output formats is available on the APD  
532 GitHub repository (<https://github.com/traitecoevo/APD>).

533

## 534 **Acknowledgements**

535 Input from and conversations with the following people enhanced the review of trait  
536 definitions: Will Cornwell, Félix de Tombeur, Saskia Grootemaat, Gillian Kowalick, Thomas  
537 Mesaglio, Ruby Stephens and Isaac Towers. We are grateful to Simon Cox, Jon Smillie, Kerry  
538 Levett, Melanie Barlow, and Catherine Brady for useful conversations about how to publish a  
539 formal vocabulary. We also thank all AusTraits data contributors for providing the data that  
540 allowed AusTraits to grow into a sufficiently large, diverse database that the APD was able to  
541 emerge as a standalone resource. The AusTraits project received investment  
542 (<https://doi.org/10.47486/TD044>, <https://doi.org/10.47486/DP720>) from the Australian  
543 Research Data Commons (ARDC). The ARDC is funded by the National Collaborative Research  
544 Infrastructure Strategy (NCRIS).

## 545 **Author contributions**

546 E.H.W., H.S., R.V.G., and D.S.F. conceived the original idea.

547 E.H.W. led the writing of the manuscript.

548 E.H.W, R.B, C.B. and D.S.F. led the coding and the technical development of the RDF  
549 serialisations.

550 E.H.W, S.Y. and D.C let the AusTraits team review of trait concepts.

551 T.B., B.C., D.E., B.M, and H.S. offered expert reviews of traits.

552 E.H.W., H.S., R.V.G, T.A., R.L.B., D.C., L.D., C.G., L.G., G.J.J., A.L., P.L., T.L., R.N., M.O., K.S., P.V.,  
553 I.J.W., M.W., and S.Y. participated in the workshop reviews.

## 554 **Competing interests**

555 The authors declare no competing interests.

556

557

558 **Figures**

559 **Figure 1**

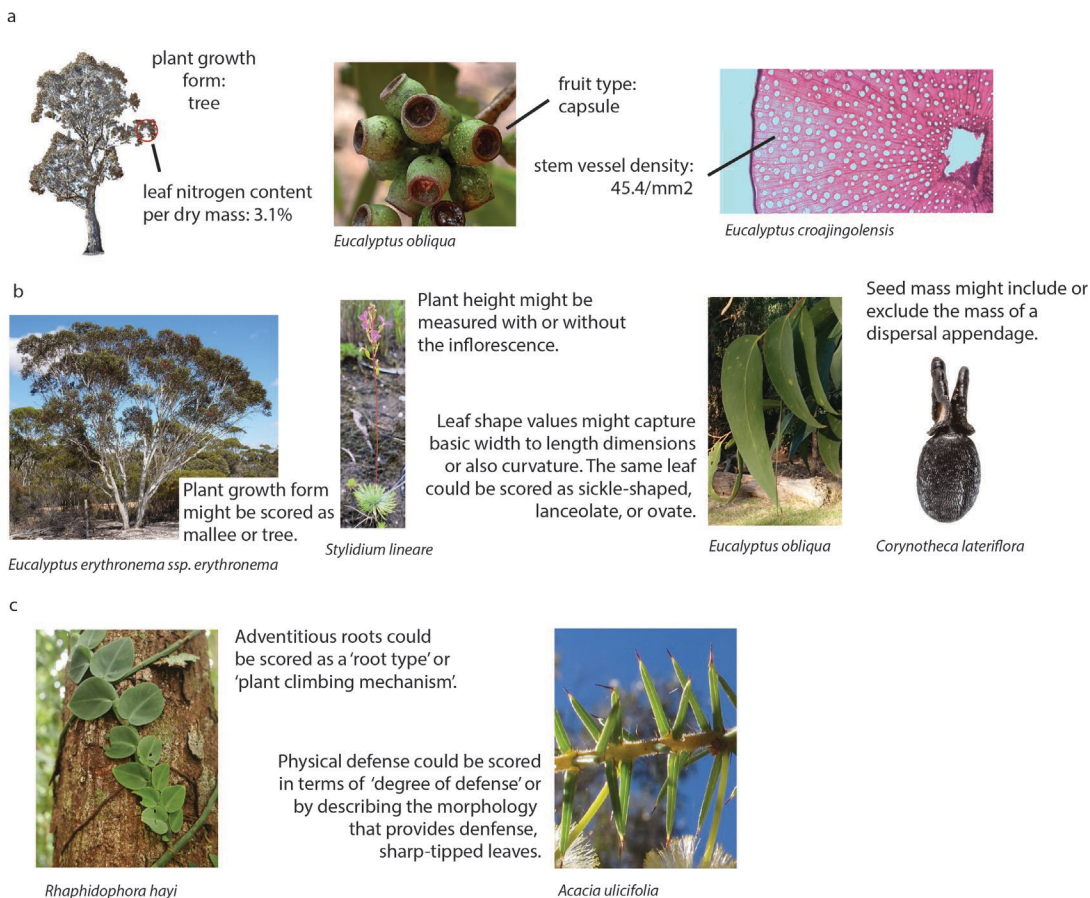

560

561

562 Figure 2.

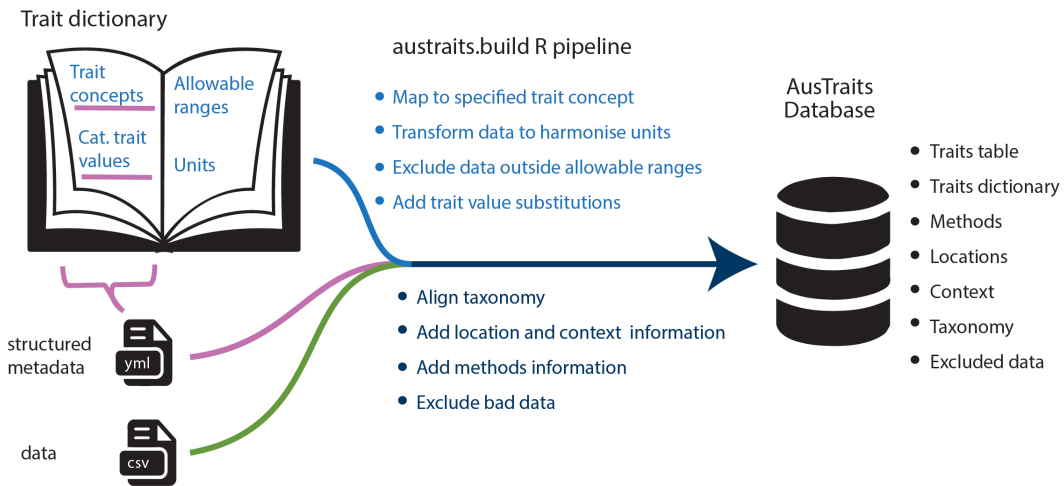

563 Input files for each study

564

565

566 Figure 3.

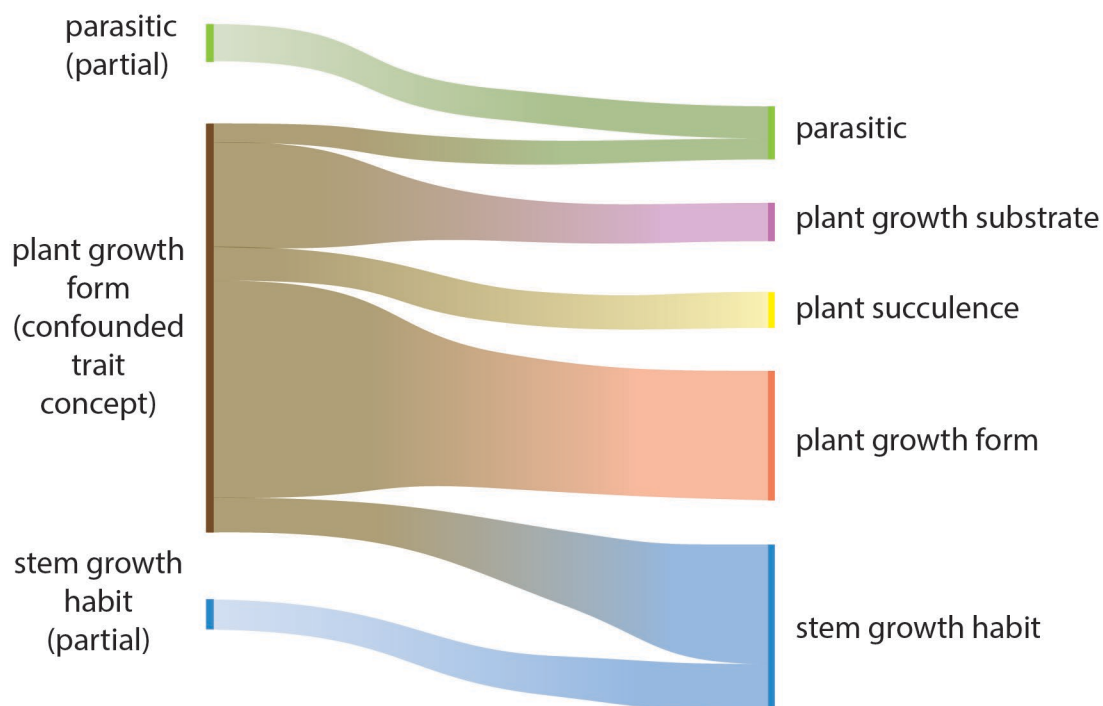

567

568



569 Figure 4.

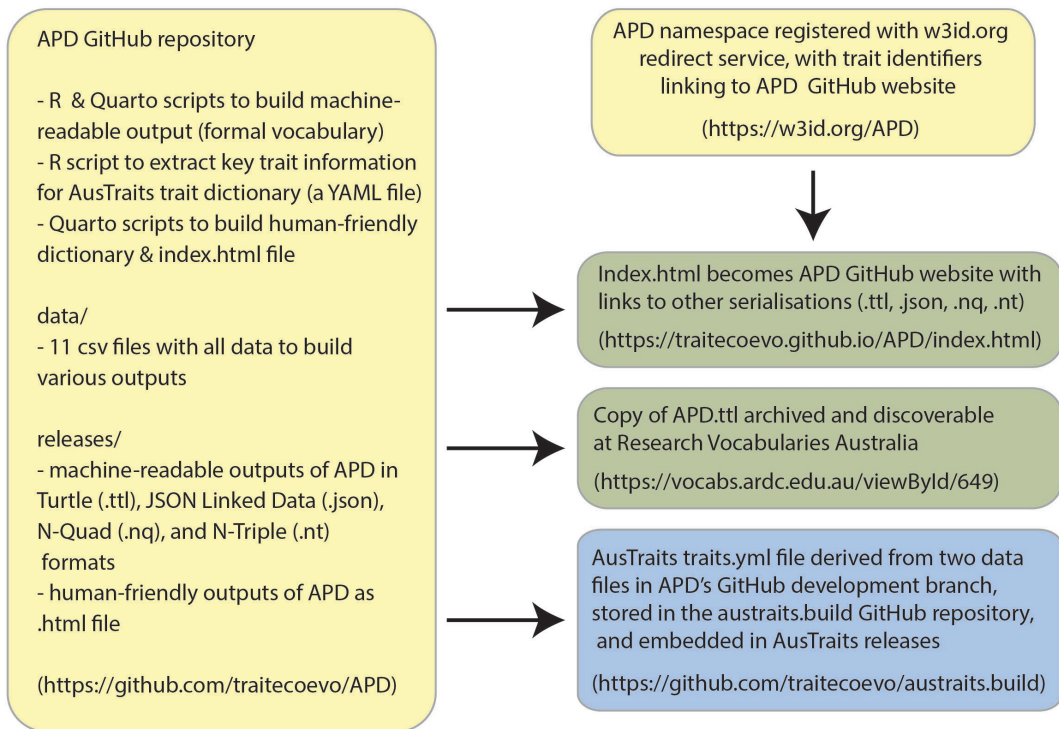

570

571

572

## 573 **Figure Legends**

574 **Figure 1.** Explicit definitions and value descriptions are needed to reconcile inconsistencies in  
575 how researchers align plant phenotypic diversity with particular traits and trait values. a) For  
576 some taxa, for some phenotype observations, all researchers are likely to assign the same  
577 observation to the same trait and trait value; b) For other taxa, the same trait might not be  
578 consistently scored, especially without explicit definitions; c) Some phenotypes will be  
579 aligned to different traits or different trait values by different researchers, especially if clear  
580 trait and trait value descriptions are not available. Photo credits: Russell Barrett (*Corynotheca*  
581 *lateriflora* seed); John Cull, iNaturalist (*Eucalyptus obliqua* leaves); Gillian Kowalick (*Eucalyptus*  
582 *croajingolensis* cross-section); Dean Nicolle, iNaturalist (*Eucalyptus erythronema* subsp. *erythronema*);  
583 Elizabeth Wenk (*Acacia ulicifolia*; *Rhaphidophora hayi*); Dylan Wishart, iNaturalist (*Eucalyptus obliqua*  
584 fruits); hughberry, iNaturalist (*Stylidium lineare*).

585

586 **Figure 2.** A trait dictionary is an essential component of the AusTraits workflow, specifying i)  
587 trait concepts, ii) standard units, iii) allowable categorical trait values and iv) allowable  
588 ranges for numeric traits. The structured metadata file that accompanies each dataset  
589 explicitly maps data columns to specific trait concepts from the dictionary and includes  
590 substitutions to align categorical trait values with those in the dictionary. All four elements of  
591 each trait definition are then used by the traits.build R pipeline to integrate the data source  
592 into the AusTraits database.

593

594 **Figure 3.** The initial list of trait values mapped to the semantically messy trait concept `plant  
595 growth form` and the trait concepts `parasitic` and `stem growth habit` were able to be  
596 condensed from 68 to 53, despite adding more detailed trait values to parasitic, plant  
597 succulence and stem growth habit traits. For the APD, the retained trait values were mapped  
598 across 5 traits: plant growth form, plant succulence, plant growth substrate, parasitic and  
599 stem growth habit. The mixing of semantic concepts within `plant growth form` had  
600 previously resulted in hybrid terms which could now be eliminated, such as "shrub\_aquatic".

601

602 **Figure 4.** The APD inputs and stored on the project GitHub repository, the versioned outputs  
603 archived on the GitHub repository, Zenodo, and at the Australian Data Research Common's  
604 Research Vocabulary Australia (RVA) portal. APD has been registered as a namespace within  
605 w3id.org, with term URI's redirecting back to an HTML landing page within the GitHub  
606 repository. The APD inputs are also used to generate the traits.yml file required to build the  
607 AusTraits trait database.

608

609

610 **Tables**

611

612 **Table 1.** Information specified about trait concepts in a selection of trait thesauri,  
 613 dictionaries, ontologies and databases. (citations: Plant Trait Ontology <sup>30</sup>; TOP <sup>17</sup>; EnvThes <sup>31</sup>;  
 614 TRY <sup>6</sup>; GIFT <sup>7</sup>; BIEN <sup>8</sup>; LEDA <sup>27</sup>; BROT 2.0 <sup>10</sup>

|                                                                                   | definitions | links to identical trait concepts | specifies units | specifies allowable ranges | specifies and defines allowable trait values | includes references | Machine readable definitions |
|-----------------------------------------------------------------------------------|-------------|-----------------------------------|-----------------|----------------------------|----------------------------------------------|---------------------|------------------------------|
| <b>Thesaurus, Dictionary or Ontology</b>                                          |             |                                   |                 |                            |                                              |                     |                              |
| AusTraits Plant Dictionary (APD)                                                  | YES         | YES                               | YES             | YES                        | YES                                          | partially           | YES                          |
| Plant Trait Ontology (PTO)                                                        | YES         | rarely                            | NO              | NO                         | partially                                    | NO                  | YES                          |
| Thesaurus Of Plant Characteristics (TOP)                                          | YES         | NO                                | YES             | NO                         | YES                                          | partially           | partially                    |
| Thesaurus for long term ecological research, monitoring and experiments (EnvThes) | partially   | partially                         | NO              | NO                         | NO                                           | NO                  | YES                          |
| <b>Database</b>                                                                   |             |                                   |                 |                            |                                              |                     |                              |
| TRY                                                                               | partially   | NO                                | YES             | NO                         | NO                                           | NO                  | NO                           |
| GIFT                                                                              | NO          | NO                                | YES             | NO                         | YES                                          | NO                  | NO                           |
| BIEN                                                                              | NO          | NO                                | YES             | NO                         | YES                                          | NO                  | NO                           |
| LEDA                                                                              | YES         | NO                                | YES             | YES                        | YES                                          | YES                 | NO                           |
| BROT                                                                              | YES         | YES                               | YES             | partially                  | YES                                          | YES                 | NO                           |

615

616

617 **Table 2.** Traits were divided into clusters requiring different styles of review

| Review category       | Example trait concepts                                                                              | Count of traits in category |
|-----------------------|-----------------------------------------------------------------------------------------------------|-----------------------------|
| AusTraits team review | Leaf N per leaf dry mass,<br>Bark water content per unit bark dry mass,<br>Palisade cell length     | 289                         |
| Expert review         | Leaf Jmax per unit leaf area,<br>Sapwood specific conductivity (Ks),<br>Pollen grain aperture shape | 114                         |
| Workshop discussion   | Plant growth form, Seed shape, Fire response,<br>Storage organ, Leaf shape                          | 112                         |

618

619

620

621 **Table 3.** Metadata provided for each trait concept, including a description of each metadata  
622 field and the published annotation property onto which this information is mapped.  
623

## Identifiers and Labels

| APD Field                | Description                                                    | Type        | Annotation property | Example for fruit length |
|--------------------------|----------------------------------------------------------------|-------------|---------------------|--------------------------|
| Label                    | A concise English label for the trait                          | Text string | SKOS:label          | Fruit length             |
| AusTraits database label | A label for the trait where words are connected by underscores | Text string | SKOS:altLabel       | fruit_length             |
| Trait ID                 | A numeric identifier                                           | Text string | dcterms:identifier  | trait_0012512            |

## Descriptions

|             |                                                                                                                                                                                                                                    |             |                     |                                                                                                                                                                                                                                                                                                                                    |
|-------------|------------------------------------------------------------------------------------------------------------------------------------------------------------------------------------------------------------------------------------|-------------|---------------------|------------------------------------------------------------------------------------------------------------------------------------------------------------------------------------------------------------------------------------------------------------------------------------------------------------------------------------|
| Description | A pair of descriptions, ranging from 1-3 sentences that clearly indicates the trait's scope. One description is written in plain English and for the second, technical terms are linked to published ontologies whenever possible. | Text string | dcterms:description | Linear dimension from the base to the apex of a fresh fruit, even if this is not the longest dimension.<br><br>A fruit morphology trait [TO:0002629] which is the length [PATO:0000122] of a fresh [EnvThes:21976] fruit [PO:0009001] from the fruit proximal end [PO:0008002] (base) to the fruit distal end [PO:0008001] (apex). |
| Comments    | Additional notes about the scope of the trait or acceptable methods.                                                                                                                                                               | Text string | RDFS:comment        | (none)                                                                                                                                                                                                                                                                                                                             |

## Metadata required for processing

|                                         |                                                                                                                                                                                                                        |                               |                                           |                     |
|-----------------------------------------|------------------------------------------------------------------------------------------------------------------------------------------------------------------------------------------------------------------------|-------------------------------|-------------------------------------------|---------------------|
| Type                                    | Type of trait, specifying if traits are categorical, numeric, or ordinal                                                                                                                                               | Entity IRI**                  | ETS:valueType                             | continuous variable |
| Units                                   | The preferred units for the trait, conforming to the Unified Code for Units of Measure (UCUM). There are often two entries for units, one that is a string and the second which links to a units of measurement axiom. | Entity IRI and/or Text string | ETS:expectedUnit                          | mm                  |
| Allowed values min & Allowed values max | A lower and upper boundary for accepted numerical values                                                                                                                                                               | Number                        | ETS:minAllowedValue & ETS:maxAllowedValue | 0.01 - 2000         |
| Allowed values levels                   | Allowable terms (trait values) for categorical traits                                                                                                                                                                  | Text string                   | ETS:factorLevels***                       | NA                  |

## Metadata to increase trait concept findability

|                         |                                                                                                                                                          |                               |                                  |                                  |
|-------------------------|----------------------------------------------------------------------------------------------------------------------------------------------------------|-------------------------------|----------------------------------|----------------------------------|
| Measured structure      | Indication of what organ(s), tissue(s), or other plant structure is being measured for a given trait                                                     | Entity IRI                    | iadopt:hasContextObject          | Fruit; reproductive shoot system |
| Measured characteristic | Keywords pertaining to what categorical or numeric property is measured, such as whether the measurement is a length, volume, duration of time, or shape | Entity IRI                    | oboe-core:MeasuredCharacteristic | Length; size                     |
| Keyword                 | Additional descriptors beyond the trait category, tissue entity and measured characteristic which facilitate information retrieval                       | Entity IRI and/or text string | SIO:000147 (keyword)             | reproduction                     |

## Metadata to increase trait concept documentation

|                        |                                                                                                            |             |                                  |                                                                                                                                      |
|------------------------|------------------------------------------------------------------------------------------------------------|-------------|----------------------------------|--------------------------------------------------------------------------------------------------------------------------------------|
| References             | Key sources for trait concept, scope and definition                                                        | Entity IRI  | dcterms:references               | Pérez-Harguindeguy 2013<br>Kew Seed Information Database 2022                                                                        |
| Scope of trait concept | The scope of the trait, specifying taxonomic or morphological groupings to which the trait concept applies | Text string | SKOS:scopeNote                   | NA                                                                                                                                   |
| Date created           | The date when the trait metadata was first created                                                         | Date        | dcterms:created (date created)   | 14/07/2021                                                                                                                           |
| Date modified          | The date when the trait metadata was last revised                                                          | Date        | dcterms:modified (date modified) | 30/11/2021                                                                                                                           |
| Previous trait labels  | Trait labels previously used for this trait concept                                                        | Text string | SKOS:changeNote                  | NA                                                                                                                                   |
| Reviewer               | People who have reviewed the trait concept, identified by ORCID number                                     | Entity IRI  | datacite/4.4:isReviewedBy        | Elizabeth Wenk, Hervé Sauquet, Russell Barrett, Carl Gosper, Lydia Guja, Gregory J. Jordan, Mark Ooi, Karen D. Sommerville, Lily Dun |
| UCUM code              | Preferred units, expressed as a UCUM code                                                                  | Text string | uom:UCUM_code                    | mm                                                                                                                                   |
| SI code                | Preferred units, expressed in SI format                                                                    | Entity IRI  | uom:SI_code                      | millimetre                                                                                                                           |

#### Metadata to increase trait concept interoperability

|               |                                                                 |                               |                   |                                                                                                                                                                                                                                                                                                                                                                                                           |
|---------------|-----------------------------------------------------------------|-------------------------------|-------------------|-----------------------------------------------------------------------------------------------------------------------------------------------------------------------------------------------------------------------------------------------------------------------------------------------------------------------------------------------------------------------------------------------------------|
| Exact match   | Identical trait concepts in other trait databases or ontologies | Entity IRI and/or text string | SKOS:exactMatch   | -Fruit length [TOP92] ( <a href="https://top-thesaurus.org/index">https://top-thesaurus.org/index</a> )<br>-Fruit length [TRY:918] ( <a href="https://www.try-db.org/de/de.php">https://www.try-db.org/de/de.php</a> )<br>-fruit_length [GIFT:3.13] ( <a href="https://gift.uni-goettingen.de">https://gift.uni-goettingen.de</a> )<br>-AverageFruitLength_cm;<br>MinFruitLength_cm;<br>MaxFruitLength_cm |
| Close match   | Similar trait concepts in other trait databases or ontologies   | Entity IRI and/or text string | SKOS:closeMatch   | maximum fruit length;<br>minimum fruit length [BIEN] ( <a href="https://bien.nceas.ucsb.edu/bien/biendata">https://bien.nceas.ucsb.edu/bien/biendata</a> )                                                                                                                                                                                                                                                |
| Related match | Related trait concepts in other trait databases or ontologies   | Entity IRI and/or text string | SKOS:relatedMatch |                                                                                                                                                                                                                                                                                                                                                                                                           |

624 \* The annotation properties indicate the source ontology for each field, with the  
625 abbreviations linked to the source vocabularies as follows: SKOS =  
626 <http://www.w3.org/2004/02/skos/core#>; dcterms = <http://purl.org/dc/terms/>; RDFS =  
627 <http://www.w3.org/2000/01/rdf-schema#>; ETS = <http://terminologies.gfbio.org/terms/ETS/>;  
628 uom = <https://w3id.org/uom/>; iadopt = <https://w3id.org/iadopt/ont/>; oboe-core =  
629 <http://ecoinformatics.org/oboe/oboe.1.2/oboe-core.owl#>; SIO =  
630 <http://semanticscience.org/resource/>; datacite = <http://purl.org/datacite/v4.4/>

631 \*\* 'Entity IRI' indicates that the information within this field is a term that has its own URL  
632 (e.g. references, reviewers ORCIDs) or Internationalized Resource Identifier (IRI); for terms in  
633 a published vocabulary/ontology).

634 \*\*\* Allowable categorical trait values (allowable levels) are mapped in APD as SKOS:member  
635 of a collection (for each trait) or owl:individual that are instances of a trait (owl:class)

636



637 **Table 4.** Explicitly listing synonyms as part of trait value definitions ensured alternative  
638 terminology can be consistently mapped to the term used in the APD, as illustrated here for  
639 seed surface texture.

| Trait Value | Synonyms                                                                              |
|-------------|---------------------------------------------------------------------------------------|
| bumpy       | colliculate, verrucate, papillate, tuberculate, undulate                              |
| grooved     |                                                                                       |
| netted      | reticulate, honey-combed                                                              |
| papery      | chartaceous                                                                           |
| pitted      | foveolate, foveate, dimpled, lacunose, punctate                                       |
| ribbed      | carinate, costate, fluted, lineate, lineolate, ridged, scalariform, striate, strigose |
| rough       | scabrous                                                                              |
| scaly       | scurfy, squarrose                                                                     |
| smooth      | glabrous                                                                              |
| spiny       | echinulate                                                                            |
| wrinkled    | rugose, rugulose, bullate                                                             |

640

641

642

643 Supplementary Tables

644

645 **Supplementary Table 1.** Number of traits in each of the hierarchical trait groupings.

| trait grouping                                          | number of trait concepts within group* |
|---------------------------------------------------------|----------------------------------------|
| <b>biochemical trait</b>                                |                                        |
| <b>mineral and ion content trait</b>                    |                                        |
| leaf mineral and ion content trait                      |                                        |
| live leaf mineral and ion content trait                 | 33                                     |
| senesced leaf mineral and ion content trait             | 16                                     |
| stem mineral and ion content trait                      | 17                                     |
| wood mineral and ion content trait                      | 7                                      |
| senesced wood mineral and ion content trait             | 6                                      |
| bark mineral and ion content trait                      | 9                                      |
| root mineral and ion content trait                      | 3                                      |
| reproductive shoot system mineral and ion content trait | 13                                     |
| cell or tissue mineral and ion content trait            | 14                                     |
| <b>metabolite content trait</b>                         |                                        |
| carbohydrate content trait                              | 13                                     |
| lipid content trait                                     | 1                                      |
| phenolic compound content trait                         | 5                                      |
| pigment content trait                                   | 9                                      |
| protein content trait                                   | 4                                      |
| <b>stable isotope ratio determination</b>               | 14                                     |
| <b>plant morphology trait</b>                           |                                        |
| <b>whole plant morphology trait</b>                     | 5                                      |
| plant embryo morphology trait                           | 8                                      |
| <b>plant structure morphology trait</b>                 | 6                                      |
| portion of plant tissue morphology trait                | 11                                     |
| plant cell morphology trait                             | 6                                      |
| <b>leaf morphology trait</b>                            | 30                                     |
| leaf size trait                                         | 11                                     |
| leaf mass trait                                         | 16                                     |
| leaf shape trait                                        | 10                                     |
| leaf position trait                                     | 5                                      |
| leaf stomatal complex morphology trait                  | 6                                      |
| leaf optical properties trait                           | 4                                      |
| <b>stem morphology trait</b>                            | 34                                     |
| stem mass trait                                         | 6                                      |
| <b>bark morphology trait</b>                            | 9                                      |
| <b>root system morphology trait</b>                     | 14                                     |
| <b>reproductive shoot system morphology trait</b>       | 3                                      |
| floral organ morphology trait                           | 4                                      |
| perianth morphology trait                               | 12                                     |

|                                                              |    |
|--------------------------------------------------------------|----|
| androecium morphology trait                                  | 14 |
| gynoecium morphology trait                                   | 8  |
| fruit morphology trait                                       | 13 |
| seed morphology trait                                        | 16 |
| <b>vascular tissue morphology trait</b>                      | 5  |
| leaf vein morphology trait                                   | 4  |
| xylem vessel morphology trait                                | 10 |
| <b>plant structure strength trait</b>                        | 10 |
| <b>biological process trait, physiological process trait</b> |    |
| photosynthetic trait                                         | 2  |
| gas exchange trait                                           | 13 |
| photosynthetic rate trait                                    | 7  |
| respiration rate trait                                       | 4  |
| transpiration rate trait                                     | 6  |
| carbon dioxide concentration trait                           | 6  |
| photosystem performance trait                                | 11 |
| water transport trait, hydraulic trait                       | 44 |
| nutrient recycling trait                                     | 2  |
| <b>life history trait</b>                                    | 5  |
| whole plant phenotype trait                                  | 16 |
| plant phenological trait                                     | 16 |
| interspecific interactions trait                             | 8  |
| genetic structure trait                                      | 2  |
| reproductive structure life history trait                    | 14 |
| fire response trait                                          | 32 |
| chemical stress sensitivity trait                            | 3  |
| environmental tolerance trait                                | 16 |

646

647 \* The total number of traits in this table is greater than the total number of traits in APD,  
 648 since some traits appear in multiple categories.

649

650 **Supplementary Table 2.** Output for the trait `life history` from APD.ttl

651

652 APD:trait\_0030012

653 a owl:Class, skos:Concept ;

654 rdfs:label "Life history"@en ;

655 skos:prefLabel "Life history"@en ;

656 skos:altLabel "life\_history" ;

657 skos:definition "Categorical description of the duration [PATO:0001309] of a plant's  
658 lifespan (longevity [NCIT:C153298]), from seed germination [GO:0009845] to death  
659 [GO:0016265]."@en, "Categorical description of the duration of a plant's lifespan, from  
660 germination to death."@en ;

661 dcterms:description "Categorical description of the duration [PATO:0001309] of a plant's  
662 lifespan (longevity [NCIT:C153298]), from seed germination [GO:0009845] to death  
663 [GO:0016265]."@en, "Categorical description of the duration of a plant's lifespan, from  
664 germination to death."@en ;

665 rdfs:comment "Studies will differ in the subset of terms they use to describe a plant's life  
666 history, such that some researchers will distinguish between ephemeral and annual species,  
667 and other researchers will group these life history categories together under `annual`. In  
668 addition, only a subset of studies will use the term `short-lived perennial`; the majority will  
669 score all perennial plants as `perennial`. Rangeland studies and post-fire studies are those  
670 most likely to score species as `ephemeral` or `short-lived perennial`, as these are  
671 environments where perennial species' lifespans are often divided into those that are short-  
672 lived due to environmental conditions and those that are able to persist through the  
673 environmentally unfavourable period."@en ;

674 dcterms:identifier "trait\_0030012" ;

675 ets:valueType obo:STATO\_0000252 ;

676 oboecore:MeasuredCharacteristic obo:PATO\_0000165, obo:PATO\_0001309,  
677 obo:PATO\_0001995 ;

678 ont:hasContextObject obo:PO\_0000003 ;

679 skos:narrower APD:life\_history\_annual, APD:life\_history\_biennial,  
680 APD:life\_history\_ephemeral, APD:life\_history\_perennial,  
681 APD:life\_history\_short\_lived\_perennial ;

682 datacite:lsReviewedBy <<https://orcid.org/0000-0001-5640-5910>>,  
683 <<https://orcid.org/0000-0001-8305-3236>>, <<https://orcid.org/0000-0001-8338-9143>>,  
684 <<https://orcid.org/0000-0002-0712-5143>>, <<https://orcid.org/0000-0002-1773-6597>>,  
685 <<https://orcid.org/0000-0002-6033-2766>>, <<https://orcid.org/0000-0003-0360-8321>>,  
686 <<https://orcid.org/0000-0003-1116-9402>>, <<https://orcid.org/0000-0003-2008-7062>>,  
687 <<https://orcid.org/0000-0003-3568-2606>> ;

688 dcterms:created "14/07/2021"^^<xsd:date> ;

689 dcterms:reviewed "31/10/2022"^^<xsd:date> ;

690 dcterms:references <<https://doi.org/10.1071/BT12225>>,  
691 <<https://uol.de/en/landeco/research/leda/standards>> ;

692 SIO:SIO\_000147 obo:GO\_0016265, obo:NCIT\_C153298 ;

693 rdfs:subClassOf APD:trait\_group\_0030006 ;  
694 skos:broader APD:trait\_group\_0030006 ;  
695 skos:closeMatch "plant lifespan and age of first flowering [LEDA:1.3] ([https://www.try-  
696 db.org/de/de.php](https://www.try-db.org/de/de.php))" ;  
697 skos:exactMatch obo:TO\_0002725, "Plant lifespan (longevity) [TRY:59] ([https://www.try-  
698 db.org/de/de.php](https://www.try-db.org/de/de.php))", "lifecycle [GIFT:2.1.1] (<https://gift.uni-goettingen.de>)" ;  
699 skos:closeMatch "plant lifespan and age of first flowering [LEDA:1.3] ([https://www.try-  
700 db.org/de/de.php](https://www.try-<br/>700 db.org/de/de.php))" ;  
701 skos:relatedMatch "Growth form [BROT:1] (<http://doi.org/10.1038/sdata.2018.135>)  
702 (<http://doi.org/10.1038/sdata.2018.135>)" ;  
703 skos:scopeNote "none"@en ;  
704 skos:inScheme "https://w3id.org/APD/traits" .  
705  
706  
707

708      Supplementary Table 3. Traits within the APD.

709

## Biochemical Traits

| label                                                          | alternate label (AusTraits `trait_name`) | APD identifier |
|----------------------------------------------------------------|------------------------------------------|----------------|
| Leaf aluminium (Al) content per unit leaf dry mass             | leaf_Al_per_dry_mass                     | trait_0000012  |
| Leaf boron (B) content per unit leaf dry mass                  | leaf_B_per_dry_mass                      | trait_0000014  |
| Leaf carbon (C) content per unit leaf dry mass                 | leaf_C_per_dry_mass                      | trait_0000016  |
| Leaf calcium (Ca) content per unit leaf dry mass               | leaf_Ca_per_dry_mass                     | trait_0000018  |
| Leaf chlorine (Cl) content per unit leaf dry mass              | leaf_Cl_per_dry_mass                     | trait_0000020  |
| Leaf chromium (Cr) content per unit leaf dry mass              | leaf_Cr_per_dry_mass                     | trait_0000022  |
| Leaf cobalt (Co) content per unit leaf dry mass                | leaf_Co_per_dry_mass                     | trait_0000024  |
| Leaf copper (Cu) content per unit leaf dry mass                | leaf_Cu_per_dry_mass                     | trait_0000026  |
| Leaf iron (Fe) content per unit leaf dry mass                  | leaf_Fe_per_dry_mass                     | trait_0000028  |
| Leaf potassium (K) content per unit leaf area                  | leaf_K_per_area                          | trait_0000029  |
| Leaf potassium (K) content per unit leaf dry mass              | leaf_K_per_dry_mass                      | trait_0000030  |
| Leaf magnesium (Mg) content per unit leaf dry mass             | leaf_Mg_per_dry_mass                     | trait_0000032  |
| Leaf manganese (Mn) content per unit leaf dry mass             | leaf_Mn_per_dry_mass                     | trait_0000034  |
| Leaf molybdenum (Mo) content per unit leaf dry mass            | leaf_Mo_per_dry_mass                     | trait_0000036  |
| Leaf nitrogen (N) content per unit leaf area                   | leaf_N_per_area                          | trait_0000037  |
| Leaf nitrogen (N) content per unit leaf dry mass               | leaf_N_per_dry_mass                      | trait_0000038  |
| Leaf sodium (Na) content per unit leaf dry mass                | leaf_Na_per_dry_mass                     | trait_0000040  |
| Leaf nickel (Ni) content per unit leaf dry mass                | leaf_Ni_per_dry_mass                     | trait_0000042  |
| Leaf phosphorus (P) content per unit leaf area                 | leaf_P_per_area                          | trait_0000043  |
| Leaf phosphorus (P) content per unit leaf dry mass             | leaf_P_per_dry_mass                      | trait_0000044  |
| Leaf sulphur (S) content per unit leaf dry mass                | leaf_S_per_dry_mass                      | trait_0000046  |
| Leaf selenium (Se) content per unit leaf dry mass              | leaf_Se_per_dry_mass                     | trait_0000048  |
| Leaf silicon (Si) content per unit leaf dry mass               | leaf_Si_per_dry_mass                     | trait_0000050  |
| Leaf zinc (Zn) content per unit leaf dry mass                  | leaf_Zn_per_dry_mass                     | trait_0000052  |
| Leaf carbon to nitrogen ratio (C/N)                            | leaf_CN_ratio                            | trait_0000090  |
| Leaf nitrogen to phosphorus ratio (N/P) per unit leaf dry mass | leaf_NP_ratio                            | trait_0000091  |
| Senesced leaf aluminium (Al) content per unit leaf dry mass    | leaf_senesced_Al_per_dry_mass            | trait_0000112  |
| Senesced leaf boron (B) content per unit leaf dry mass         | leaf_senesced_B_per_dry_mass             | trait_0000114  |
| Senesced leaf carbon (C) content per unit leaf dry mass        | leaf_senesced_C_per_dry_mass             | trait_0000116  |
| Senesced leaf calcium (Ca) content per unit leaf dry mass      | leaf_senesced_Ca_per_dry_mass            | trait_0000118  |
| Senesced leaf copper (Cu) content per unit leaf dry mass       | leaf_senesced_Cu_per_dry_mass            | trait_0000126  |
| Senesced leaf iron (Fe) content per unit leaf dry mass         | leaf_senesced_Fe_per_dry_mass            | trait_0000128  |
| Senesced leaf potassium (K) content per unit leaf dry mass     | leaf_senesced_K_per_dry_mass             | trait_0000130  |
| Senesced leaf magnesium (Mg) content per unit leaf dry mass    | leaf_senesced_Mg_per_dry_mass            | trait_0000132  |
| Senesced leaf manganese (Mn) content per unit leaf dry mass    | leaf_senesced_Mn_per_dry_mass            | trait_0000134  |
| Senesced leaf molybdenum (Mo) content per unit leaf dry mass   | leaf_senesced_Mo_per_dry_mass            | trait_0000136  |

|                                                              |                               |               |
|--------------------------------------------------------------|-------------------------------|---------------|
| Senesced leaf nitrogen (N) content per unit leaf dry mass    | leaf_senesced_N_per_dry_mass  | trait_0000138 |
| Senesced leaf sodium (Na) content per unit leaf dry mass     | leaf_senesced_Na_per_dry_mass | trait_0000140 |
| Senesced leaf nickel (Ni) content per unit leaf dry mass     | leaf_senesced_Ni_per_dry_mass | trait_0000142 |
| Senesced leaf phosphorus (P) content per unit leaf dry mass  | leaf_senesced_P_per_dry_mass  | trait_0000144 |
| Senesced leaf sulphur (S) content per unit leaf dry mass     | leaf_senesced_S_per_dry_mass  | trait_0000146 |
| Senesced leaf zinc (Zn) content per unit leaf dry mass       | leaf_senesced_Zn_per_dry_mass | trait_0000152 |
| Leaf nitrogen resorption                                     | leaf_N_resorption             | trait_0022012 |
| Leaf phosphorus resorption                                   | leaf_P_resorption             | trait_0022013 |
| Stem carbon (C) content per unit stem dry mass               | stem_C_per_dry_mass           | trait_0000216 |
| Stem nitrogen (N) content per unit stem dry mass             | stem_N_per_dry_mass           | trait_0000238 |
| Wood carbon (C) content per unit wood dry mass               | wood_C_per_dry_mass           | trait_0000416 |
| Wood calcium (Ca) content per unit wood dry mass             | wood_Ca_per_dry_mass          | trait_0000418 |
| Wood potassium (K) content per unit wood dry mass            | wood_K_per_dry_mass           | trait_0000430 |
| Wood magnesium (Mg) content per unit wood dry mass           | wood_Mg_per_dry_mass          | trait_0000432 |
| Wood nitrogen (N) content per unit wood dry mass             | wood_N_per_dry_mass           | trait_0000438 |
| Wood sodium (Na) content per unit wood dry mass              | wood_Na_per_dry_mass          | trait_0000440 |
| Wood phosphorus (P) content per unit wood dry mass           | wood_P_per_dry_mass           | trait_0000444 |
| Dead wood calcium (Ca) content per unit dead wood dry mass   | wood_dead_Ca_per_dry_mass     | trait_0000518 |
| Dead wood potassium (K) content per unit dead wood dry mass  | wood_dead_K_per_dry_mass      | trait_0000530 |
| Dead wood magnesium (Mg) content per unit dead wood dry mass | wood_dead_Mg_per_dry_mass     | trait_0000532 |
| Dead wood nitrogen (N) content per unit dead wood dry mass   | wood_dead_N_per_dry_mass      | trait_0000538 |
| Dead wood sodium (Na) content per unit dead wood dry mass    | wood_dead_Na_per_dry_mass     | trait_0000540 |
| Dead wood phosphorus (P) content per unit dead wood dry mass | wood_dead_P_per_dry_mass      | trait_0000544 |
| Bark aluminium (Al) content per unit bark dry mass           | bark_Al_per_dry_mass          | trait_0000612 |
| Bark boron (B) content per unit bark dry mass                | bark_B_per_dry_mass           | trait_0000614 |
| Bark carbon (C) content per unit bark dry mass               | bark_C_per_dry_mass           | trait_0000616 |
| Bark calcium (Ca) content per unit bark dry mass             | bark_Ca_per_dry_mass          | trait_0000618 |
| Bark copper (Cu) content per unit bark dry mass              | bark_Cu_per_dry_mass          | trait_0000626 |
| Bark iron (Fe) content per unit bark dry mass                | bark_Fe_per_dry_mass          | trait_0000628 |
| Bark potassium (K) content per unit bark dry mass            | bark_K_per_dry_mass           | trait_0000630 |
| Bark magnesium (Mg) content per unit bark dry mass           | bark_Mg_per_dry_mass          | trait_0000632 |
| Bark manganese (Mn) content per unit bark dry mass           | bark_Mn_per_dry_mass          | trait_0000634 |
| Bark nitrogen (N) content per unit bark dry mass             | bark_N_per_dry_mass           | trait_0000638 |
| Bark sodium (Na) content per unit bark dry mass              | bark_Na_per_dry_mass          | trait_0000640 |
| Bark phosphorus (P) content per unit bark dry mass           | bark_P_per_dry_mass           | trait_0000644 |
| Bark sulphur (S) content per unit bark dry mass              | bark_S_per_dry_mass           | trait_0000646 |
| Bark zinc (Zn) content per unit bark dry mass                | bark_Zn_per_dry_mass          | trait_0000652 |



|                                                                               |                                            |               |
|-------------------------------------------------------------------------------|--------------------------------------------|---------------|
| Root carbon (C) content per unit root dry mass                                | root_C_per_dry_mass                        | trait_0000816 |
| Root nitrogen (N) content per unit root dry mass                              | root_N_per_dry_mass                        | trait_0000838 |
| Root phosphorus (P) content per unit root dry mass                            | root_P_per_dry_mass                        | trait_0000844 |
| Flower nitrogen (N) content per unit flower dry mass                          | flower_N_per_dry_mass                      | trait_0001038 |
| Fruit calcium (Ca) content per unit fruit dry mass                            | fruit_Ca_per_dry_mass                      | trait_0001118 |
| Fruit potassium (K) content per unit fruit dry mass                           | fruit_K_per_dry_mass                       | trait_0001130 |
| Fruit magnesium (Mg) content per unit fruit dry mass                          | fruit_Mg_per_dry_mass                      | trait_0001132 |
| Fruit nitrogen (N) content per unit fruit dry mass                            | fruit_N_per_dry_mass                       | trait_0001138 |
| Fruit phosphorus (P) content per unit fruit dry mass                          | fruit_P_per_dry_mass                       | trait_0001144 |
| Fruit sulphur (S) content per unit fruit dry mass                             | fruit_S_per_dry_mass                       | trait_0001146 |
| Seed calcium (Ca) content per unit seed dry mass                              | seed_Ca_per_seed_dry_mass                  | trait_0001218 |
| Seed potassium (K) content per unit seed dry mass                             | seed_K_per_seed_dry_mass                   | trait_0001230 |
| Seed magnesium (Mg) content per unit seed dry mass                            | seed_Mg_per_seed_dry_mass                  | trait_0001232 |
| Seed nitrogen (N) content per unit seed dry mass                              | seed_N_per_seed_dry_mass                   | trait_0001238 |
| Seed phosphorus (P) content per unit seed dry mass                            | seed_P_per_seed_dry_mass                   | trait_0001244 |
| Seed sulphur (S) content per unit seed dry mass                               | seed_S_per_seed_dry_mass                   | trait_0001246 |
| Leaf cell wall nitrogen (N) per unit cell wall dry mass                       | leaf_cell_wall_N_per_cell_wall_dry_mass    | trait_0001511 |
| Leaf cell wall nitrogen (N) per unit leaf N content                           | leaf_cell_wall_N_per_leaf_N                | trait_0001512 |
| Leaf rubisco nitrogen (N) content per unit leaf N content                     | leaf_rubisco_N_per_total_leaf_N            | trait_0001513 |
| Leaf thylakoid protein nitrogen (N) content per unit leaf N content           | leaf_thylakoid_N_per_total_leaf_N          | trait_0001514 |
| Leaf epidermis calcium (Ca) content per unit leaf fresh mass                  | leaf_epidermis_Ca_per_fresh_mass           | trait_0001611 |
| Leaf hypodermis calcium (Ca) content per unit leaf fresh mass                 | leaf_hypodermis_Ca_per_fresh_mass          | trait_0001612 |
| Leaf internal parenchyma cell calcium (Ca) content per unit leaf fresh mass   | leaf_internal_parenchyma_Ca_per_fresh_mass | trait_0001613 |
| Leaf palisade mesophyll cell calcium (Ca) content per unit leaf fresh mass    | leaf_palisade_mesophyll_Ca_per_fresh_mass  | trait_0001614 |
| Leaf sclerenchyma cell calcium (Ca) content per unit leaf fresh mass          | leaf_sclerenchyma_Ca_per_fresh_mass        | trait_0001615 |
| Leaf spongy mesophyll cell calcium (Ca) content per unit leaf fresh mass      | leaf_spongy_mesophyll_Ca_per_fresh_mass    | trait_0001616 |
| Leaf epidermis phosphorus (P) content per unit leaf fresh mass                | leaf_epidermis_P_per_fresh_mass            | trait_0001661 |
| Leaf hypodermis phosphorus (P) content per unit leaf fresh mass               | leaf_hypodermis_P_per_fresh_mass           | trait_0001662 |
| Leaf internal parenchyma cell phosphorus (P) content per unit leaf fresh mass | leaf_internal_parenchyma_P_per_fresh_mass  | trait_0001663 |
| Leaf palisade mesophyll cell phosphorus (P) content per unit leaf fresh mass  | leaf_palisade_mesophyll_P_per_fresh_mass   | trait_0001664 |
| Leaf sclerenchyma cell phosphorus (P) content per unit leaf fresh mass        | leaf_sclerenchyma_P_per_fresh_mass         | trait_0001665 |
| Leaf spongy mesophyll cell phosphorus (P) content per unit leaf fresh mass    | leaf_spongy_mesophyll_P_per_fresh_mass     | trait_0001666 |

|                                                                           |                                                  |               |
|---------------------------------------------------------------------------|--------------------------------------------------|---------------|
| Leaf total non-structural carbohydrate content per unit leaf area         | leaf_total_non-structural_carbohydrates_per_area | trait_0002021 |
| Leaf total non-structural carbohydrate content per unit leaf dry mass     | leaf_total_non-structural_carbohydrates_per_mass | trait_0002022 |
| Leaf cellulose content per unit leaf dry mass                             | leaf_cellulose_per_dry_mass                      | trait_0002024 |
| Leaf starch content per unit leaf area                                    | leaf_starch_per_area                             | trait_0002025 |
| Leaf soluble starch content per unit leaf area                            | leaf_soluble_starch_per_area                     | trait_0002027 |
| Leaf soluble starch content per unit leaf dry mass                        | leaf_soluble_starch_per_mass                     | trait_0002028 |
| Leaf soluble sugar content per unit leaf area                             | leaf_soluble_sugars_per_area                     | trait_0002031 |
| Leaf soluble sugar content per unit leaf dry mass                         | leaf_soluble_sugars_per_mass                     | trait_0002032 |
| Leaf soluble protein content per unit leaf area                           | leaf_soluble_protein_per_area                    | trait_0002035 |
| Leaf insoluble protein content per unit leaf area                         | leaf_insoluble_protein_per_area                  | trait_0002037 |
| Leaf lignin content per unit leaf dry mass                                | leaf_lignin_per_dry_mass                         | trait_0002050 |
| Total leaf phenolic content per unit leaf dry mass                        | leaf_phenol_per_dry_mass                         | trait_0002052 |
| Leaf tannin content per unit leaf dry mass                                | leaf_tannin_per_dry_mass                         | trait_0002054 |
| Leaf carotenoid content per unit leaf area                                | leaf_carotenoid_per_area                         | trait_0002055 |
| Leaf carotenoid content per unit leaf dry mass                            | leaf_carotenoid_per_dry_mass                     | trait_0002056 |
| Leaf total chlorophyll content (chlorophyll A + B) per unit leaf area     | leaf_chlorophyll_per_area                        | trait_0002081 |
| Leaf total chlorophyll content (chlorophyll A + B) per unit leaf dry mass | leaf_chlorophyll_per_dry_mass                    | trait_0002082 |
| Leaf chlorophyll A content per unit leaf area                             | leaf_chlorophyll_A_per_area                      | trait_0002083 |
| Leaf chlorophyll A content per unit leaf dry mass                         | leaf_chlorophyll_A_per_dry_mass                  | trait_0002084 |
| Leaf chlorophyll B content per unit leaf area                             | leaf_chlorophyll_B_per_area                      | trait_0002085 |
| Leaf chlorophyll B content per unit leaf dry mass                         | leaf_chlorophyll_B_per_dry_mass                  | trait_0002086 |
| Ratio of leaf chlorophyll A content to leaf chlorophyll B content         | leaf_chlorophyll_A_B_ratio                       | trait_0002087 |
| Leaf rubisco content per unit leaf dry mass                               | leaf_rubisco_per_leaf_dry_mass                   | trait_0002090 |
| Stem soluble starch content per unit stem dry mass                        | stem_soluble_starch_per_mass                     | trait_0002127 |
| Stem soluble sugar content per unit stem dry mass                         | stem_soluble_sugars_per_mass                     | trait_0002131 |
| Bark cellulose content per unit bark dry mass                             | bark_cellulose_per_dry_mass                      | trait_0002224 |
| Bark lignin content per unit bark dry mass                                | bark_lignin_per_dry_mass                         | trait_0002250 |
| Bark tannin content per unit bark dry mass                                | bark_tannin_per_dry_mass                         | trait_0002255 |
| Root soluble starch content per unit root dry mass                        | root_soluble_starch_per_mass                     | trait_0002327 |
| Root soluble sugar content per unit root dry mass                         | root_soluble_sugars_per_mass                     | trait_0002331 |
| Seed protein content per unit seed dry mass                               | seed_protein_per_seed_dry_mass                   | trait_0002534 |
| Seed oil content per unit seed dry mass                                   | seed_oil_per_seed_dry_mass                       | trait_0002544 |
| Leaf ash content per unit leaf dry mass                                   | leaf_ash_per_dry_mass                            | trait_0002822 |
| Bark ash content per unit bark dry mass                                   | bark_ash_per_dry_mass                            | trait_0002824 |
| Bark stable carbon isotope composition ( $\delta^{13}C$ )                 | bark_delta13C                                    | trait_0003011 |
| Leaf stable carbon isotope composition ( $\delta^{13}C$ )                 | leaf_delta13C                                    | trait_0003012 |
| Stem stable carbon isotope composition ( $\delta^{13}C$ )                 | stem_delta13C                                    | trait_0003013 |

|                                                           |                                |               |
|-----------------------------------------------------------|--------------------------------|---------------|
| Root stable carbon isotope composition (delta13C)         | root_delta13C                  | trait_0003014 |
| Wood stable carbon isotope composition (delta13C)         | wood_delta13C                  | trait_0003015 |
| Bark stable nitrogen isotope composition (delta15N)       | bark_delta15N                  | trait_0003031 |
| Leaf stable nitrogen isotope composition (delta15N)       | leaf_delta15N                  | trait_0003032 |
| Stem stable nitrogen isotope composition (delta15N)       | stem_delta15N                  | trait_0003033 |
| Root stable nitrogen isotope composition (delta15N)       | root_delta15N                  | trait_0003034 |
| Wood stable nitrogen isotope composition (delta15N)       | wood_delta15N                  | trait_0003035 |
| Leaf xylem stable nitrogen isotope composition (delta15N) | leaf_xylem_delta15N            | trait_0003052 |
| Root xylem stable nitrogen isotope composition (delta15N) | root_xylem_delta15N            | trait_0003053 |
| Leaf stable oxygen isotope composition (delta18O)         | leaf_delta18O                  | trait_0003072 |
| Stem water stable oxygen isotope composition (delta18O)   | stem_water_delta18O            | trait_0003092 |
| <b>Plant Morphology Trait</b>                             |                                |               |
| Plant canopy width                                        | plant_width                    | trait_0010021 |
| Plant canopy breadth                                      | plant_breadth                  | trait_0010022 |
| Plant vegetative height                                   | plant_height                   | trait_0010023 |
| Stem diameter at breast height                            | plant_diameter_breast_height   | trait_0010024 |
| Stem count                                                | stem_count                     | trait_0010025 |
| Plant spinescence                                         | plant_spinescence              | trait_0010070 |
| Embryo colour                                             | embryo_colour                  | trait_0010110 |
| Cotyledon function                                        | cotyledon_function             | trait_0010111 |
| Cotyledon position at germination                         | cotyledon_position             | trait_0010112 |
| Cotyledon hairiness                                       | cotyledon_hairs                | trait_0010113 |
| Hypocotyl hairiness                                       | seedling_hypocotyl_hairs       | trait_0010114 |
| Seedling first true leaf type                             | seedling_first_node_leaf_type  | trait_0010160 |
| Seedling first node leaf count                            | seedling_first_node_leaf_count | trait_0010161 |
| Seedling germination location                             | seedling_germination_location  | trait_0010162 |
| Leaf area                                                 | leaf_area                      | trait_0011211 |
| Leaflet area                                              | leaflet_area                   | trait_0011212 |
| Leaf length                                               | leaf_length                    | trait_0011213 |
| Leaf width                                                | leaf_width                     | trait_0011214 |
| Leaf thickness                                            | leaf_thickness                 | trait_0011215 |
| Leaf dry mass                                             | leaf_dry_mass                  | trait_0011216 |
| Leaflet dry mass                                          | leaflet_dry_mass               | trait_0011217 |
| Leaf fresh mass                                           | leaf_fresh_mass                | trait_0011218 |
| Petiole length                                            | petiole_length                 | trait_0011219 |
| Petiole width                                             | petiole_width                  | trait_0011220 |
| Leaf mass per area                                        | leaf_mass_per_area             | trait_0011230 |
| Leaf lamina mass per area                                 | leaf_lamina_mass_per_area      | trait_0011231 |
| Leaf tissue density                                       | leaf_density                   | trait_0011232 |
| Leaf area ratio (LAR)                                     | leaf_area_ratio                | trait_0011260 |

|                                                         |                                        |               |
|---------------------------------------------------------|----------------------------------------|---------------|
| Leaf mass fraction                                      | leaf_mass_fraction                     | trait_0011261 |
| Leaf dry matter content (LDMC)                          | leaf_dry_matter_content                | trait_0011262 |
| Leaf fresh mass per leaf area                           | leaf_fresh_mass_per_area               | trait_0011263 |
| Leaf water content per unit leaf area (leaf succulence) | leaf_water_content_per_area            | trait_0011264 |
| Leaf water content per unit leaf dry mass               | leaf_water_content_per_dry_mass        | trait_0011265 |
| Leaf water content per unit leaf fresh mass             | leaf_water_content_per_fresh_mass      | trait_0011266 |
| Leaf water content per unit saturated leaf mass         | leaf_water_content_per_saturated_mass  | trait_0011267 |
| Leaf cell wall fraction                                 | leaf_cell_wall_fraction                | trait_0011268 |
| Leaf type                                               | leaf_type                              | trait_0011310 |
| Leaf shape                                              | leaf_shape                             | trait_0011311 |
| Leaf base shape                                         | leaf_base_shape                        | trait_0011312 |
| Leaf margin                                             | leaf_margin                            | trait_0011313 |
| Leaf margin posture                                     | leaf_margin_posture                    | trait_0011314 |
| Leaf lobation                                           | leaf_lobation                          | trait_0011315 |
| Leaf compoundness                                       | leaf_compoundness                      | trait_0011316 |
| Leaf divisions                                          | leaf_lamina_division                   | trait_0011317 |
| Leaf lamina posture (leaf 3-dimensionality)             | leaf_posture_numeric                   | trait_0011318 |
| Leaf lamina posture (leaf 3-dimensional shape)          | leaf_lamina_posture                    | trait_0011319 |
| Leaf glaucousness                                       | leaf_glaucousness                      | trait_0011360 |
| Mature leaf hairiness                                   | leaf_hairs_adult_leaves                | trait_0011361 |
| Juvenile phase leaf hairiness                           | leaf_hairs_juvenile_leaves             | trait_0011362 |
| Immature leaf hairiness                                 | leaf_hairs_immature_leaves             | trait_0011363 |
| Leaf phyllotaxis                                        | leaf_phyllotaxis                       | trait_0011410 |
| Leaf arrangement                                        | leaf_arrangement                       | trait_0011411 |
| Leaf axil angle                                         | leaf_axil_angle                        | trait_0011412 |
| Leaf inclination angle                                  | leaf_inclination_angle                 | trait_0011413 |
| Leaf pendulousness                                      | leaf_pendulousness                     | trait_0011414 |
| Cuticle thickness on the lower leaf surface             | leaf_cuticle_thickness_abaxial         | trait_0011510 |
| Cuticle thickness on the upper leaf surface             | leaf_cuticle_thickness_adaxial         | trait_0011511 |
| Leaf epidermis thickness                                | leaf_epidermis_thickness               | trait_0011512 |
| Lower leaf side epidermis thickness                     | leaf_epidermis_thickness_abaxial       | trait_0011513 |
| Upper leaf side epidermis thickness                     | leaf_epidermis_thickness_adaxial       | trait_0011514 |
| Average leaf epidermal cell density                     | leaf_epidermal_cell_density_both_sides | trait_0011515 |
| Lower leaf side epidermal cell density                  | leaf_epidermal_cell_density_abaxial    | trait_0011516 |
| Upper leaf side epidermal cell density                  | leaf_epidermal_cell_density_adaxial    | trait_0011517 |
| Lower leaf side hypodermis thickness                    | leaf_hypodermis_thickness_abaxial      | trait_0011518 |
| Upper leaf side hypodermis thickness                    | leaf_hypodermis_thickness_adaxial      | trait_0011519 |
| Lower palisade mesophyll thickness                      | leaf_palisade_tissue_thickness_abaxial | trait_0011520 |
| Upper palisade mesophyll thickness                      | leaf_palisade_tissue_thickness_adaxial | trait_0011521 |
| Palisade cell length                                    | leaf_palisade_cell_length              | trait_0011522 |
| Palisade cell width                                     | leaf_palisade_cell_width               | trait_0011523 |

|                                                                     |                                           |               |
|---------------------------------------------------------------------|-------------------------------------------|---------------|
| Number of layers of palisade cells                                  | leaf_palisade_layer_number                | trait_0011524 |
| Spongy mesophyll cell thickness                                     | leaf_spongy_mesophyll_thickness           | trait_0011525 |
| Cell cross-sectional area                                           | cell_cross-sectional_area                 | trait_0011526 |
| Stomatal density on the lower leaf surface                          | leaf_stomatal_density_abaxial             | trait_0011610 |
| Stomatal density on the upper leaf surface                          | leaf_stomatal_density_adaxial             | trait_0011611 |
| Stomatal density averaged across both leaf surfaces                 | leaf_stomatal_density_average             | trait_0011612 |
| Stomatal distribution                                               | leaf_stomatal_distribution                | trait_0011613 |
| Stomatal hairiness                                                  | leaf_stomatal_hairs                       | trait_0011614 |
| Guard cell length                                                   | leaf_guard_cell_length                    | trait_0011615 |
| Leaf visible light transmission                                     | leaf_transmission                         | trait_0011710 |
| Leaf visible light absorption                                       | leaf_absorption                           | trait_0011711 |
| Leaf visible light reflection                                       | leaf_reflectance                          | trait_0011712 |
| Leaf infra-red light reflection                                     | leaf_reflectance_near_infrared            | trait_0011713 |
| Stem cross-sectional area                                           | stem_cross_sectional_area                 | trait_0011811 |
| Wood cross-sectional area                                           | sapwood_cross_sectional_area              | trait_0011812 |
| Terminal twig cross-sectional area                                  | branch_terminal_twig_cross_sectional_area | trait_0011813 |
| Terminal twig length                                                | branch_terminal_twig_length               | trait_0011814 |
| Wood density                                                        | wood_density                              | trait_0011815 |
| Herbaceous stem density                                             | stem_density                              | trait_0011816 |
| Huber value                                                         | huber_value                               | trait_0011911 |
| Leaf dry mass to stem dry mass ratio                                | leaf_mass_to_stem_mass_ratio              | trait_0011912 |
| Stem dry mass to vegetative shoot dry mass ratio (support fraction) | stem_mass_to_shoot_mass_ratio             | trait_0011913 |
| Side branch dry mass to whole plant dry mass ratio                  | branch_mass_fraction                      | trait_0011914 |
| Stem dry matter content (SDMC)                                      | stem_dry_matter_content                   | trait_0011915 |
| Stem water content per unit saturated stem mass                     | stem_water_content_per_saturated_mass     | trait_0011916 |
| Stem mass fraction                                                  | stem_mass_fraction                        | trait_0011917 |
| Bark morphology, Eucalyptus                                         | bark_morphology_eucalyptus                | trait_0012010 |
| Bark thickness                                                      | bark_thickness                            | trait_0012011 |
| Scaled bark thickness                                               | bark_thickness_index                      | trait_0012012 |
| Bark density                                                        | bark_density                              | trait_0012013 |
| Bark dry mass per unit bark surface area                            | bark_dry_mass_per_surface_area            | trait_0012014 |
| Bark water content per unit bark dry mass                           | bark_water_content_per_dry_mass           | trait_0012015 |
| Bark water content per unit saturated bark mass                     | bark_water_content_per_saturated_mass     | trait_0012016 |
| Root diameter                                                       | root_diameter                             | trait_0012111 |
| Root system morphology                                              | root_system_classification                | trait_0012112 |
| Fine root volume to coarse root volume ratio                        | root_fine_root_coarse_root_ratio          | trait_0012113 |
| Root biomass depth distribution coefficient                         | root_distribution_coefficient             | trait_0012114 |
| Root system type (presence of taproot)                              | root_system_type                          | trait_0012115 |
| Specific root length (SRL)                                          | root_specific_root_length                 | trait_0012116 |
| Specific tap root length (STRL)                                     | root_specific_taproot_length              | trait_0012117 |

|                                                                         |                                           |               |
|-------------------------------------------------------------------------|-------------------------------------------|---------------|
| Root surface area per unit root dry mass (specific root area)           | root_specific_root_area                   | trait_0012118 |
| Root wood density                                                       | root_wood_density                         | trait_0012119 |
| Root to shoot ratio                                                     | root_shoot_ratio                          | trait_0012120 |
| Root dry matter content (RDMC)                                          | root_dry_matter_content                   | trait_0012121 |
| Root mass fraction                                                      | root_mass_fraction                        | trait_0012122 |
| Seed accessory cost fraction                                            | accessory_cost_fraction                   | trait_0012221 |
| Seed accessory cost mass                                                | accessory_cost_mass                       | trait_0012222 |
| Number of androecium parts in each whorl (Androecium structural merism) | flower_androecium_structural_merism       | trait_0012410 |
| Androecium structural phyllotaxis                                       | flower_androecium_structural_phyllotaxis  | trait_0012411 |
| Number of androecium structural whorls                                  | flower_androecium_structural_whorls_count | trait_0012412 |
| Anther attachment                                                       | flower_anther_attachment                  | trait_0012413 |
| Connective extension (apical)                                           | flower_anther_connective_extension        | trait_0012414 |
| Anther dehiscence                                                       | flower_anther_dehiscence                  | trait_0012415 |
| Anther orientation                                                      | flower_anther_orientation                 | trait_0012416 |
| Flower colour                                                           | flower_colour                             | trait_0012417 |
| Perianth colour                                                         | perianth_colour                           | trait_0012418 |
| Flower length                                                           | flower_length                             | trait_0012419 |
| Flower diameter                                                         | flower_diameter                           | trait_0012420 |
| Floral orientation                                                      | flower_orientation                        | trait_0012421 |
| Maximum flower number                                                   | flower_count_maximum                      | trait_0012422 |
| Number of fertile stamens                                               | flower_fertile_stamens_count              | trait_0012431 |
| Filament presence and shape                                             | flower_filament                           | trait_0012432 |
| Fusion of filaments                                                     | flower_filament_fusion                    | trait_0012433 |
| Fusion of filaments to inner perianth series                            | flower_filament_fusion_to_inner_perianth  | trait_0012434 |
| Gynoecium phyllotaxis                                                   | flower_gynoecium_phyllotaxis              | trait_0012441 |
| Placentation                                                            | flower_gynoecium_placentation             | trait_0012442 |
| Fusion of ovaries                                                       | flower_ovary_fusion                       | trait_0012443 |
| Ovary position                                                          | flower_ovary_position                     | trait_0012444 |
| Number of ovules per functional carpel                                  | flower_ovules_per_functional_carpel_count | trait_0012445 |
| Perianth differentiation                                                | flower_perianth_differentiation           | trait_0012461 |
| Fusion of perianth                                                      | flower_perianth_fusion                    | trait_0012462 |
| Number of perianth parts in each whorl (Perianth merism)                | flower_perianth_merism                    | trait_0012463 |
| Number of perianth parts                                                | flower_perianth_parts_count               | trait_0012464 |
| Perianth phyllotaxis                                                    | flower_perianth_phyllotaxis               | trait_0012465 |
| Symmetry of perianth                                                    | flower_perianth_symmetry                  | trait_0012466 |
| Number of perianth whorls                                               | flower_perianth_whorls_count              | trait_0012467 |
| Pollen grain aperture shape                                             | flower_pollen_aperture_shape              | trait_0012471 |
| Number of pollen grain apertures                                        | flower_pollen_apertures_count             | trait_0012472 |
| Pollen grain length                                                     | flower_pollen_length                      | trait_0012473 |
| Number of structural carpels                                            | flower_structural_carpels_count           | trait_0012481 |

|                                                               |                                |               |
|---------------------------------------------------------------|--------------------------------|---------------|
| Floral structural sex                                         | flower_structural_sex_type     | trait_0012482 |
| Style differentiation                                         | flower_style_differentiation   | trait_0012483 |
| Fusion of styles                                              | flower_style_fusion            | trait_0012484 |
| Fruit dry mass                                                | fruit_dry_mass                 | trait_0012511 |
| Fruit length                                                  | fruit_length                   | trait_0012512 |
| Fruit width                                                   | fruit_width                    | trait_0012513 |
| Fruit breadth                                                 | fruit_height                   | trait_0012514 |
| Fruit wall thickness                                          | fruit_wall_thickness           | trait_0012515 |
| Fruit type                                                    | fruit_type                     | trait_0012516 |
| Fruit fleshiness                                              | fruit_fleshiness               | trait_0012517 |
| Fruit dehiscence                                              | fruit_dehiscence               | trait_0012518 |
| Fruit colour                                                  | fruit_colour                   | trait_0012519 |
| Seed dry mass                                                 | seed_dry_mass                  | trait_0012610 |
| Diaspore dry mass                                             | diaspore_dry_mass              | trait_0012611 |
| Seed embryo and endosperm dry mass                            | seed_dry_mass_reserve          | trait_0012612 |
| Seed length                                                   | seed_length                    | trait_0012613 |
| Seed width                                                    | seed_width                     | trait_0012614 |
| Seed height                                                   | seed_height                    | trait_0012615 |
| Seed volume                                                   | seed_volume                    | trait_0012616 |
| Seed count                                                    | seed_count                     | trait_0012617 |
| Seed shape                                                    | seed_shape                     | trait_0012618 |
| Seed surface hairs                                            | seed_surface_hairs             | trait_0012619 |
| Seed surface texture                                          | seed_surface_texture           | trait_0012620 |
| Seed surface reflectivity                                     | seed_surface_reflectivity      | trait_0012621 |
| Diaspore fleshiness                                           | diaspore_fleshiness            | trait_0012622 |
| Dispersal appendage                                           | dispersal_appendage            | trait_0012623 |
| Dispersal unit                                                | dispersal_unit                 | trait_0012624 |
| Leaf secondary vein angle                                     | leaf_secondary_vein_angle      | trait_0013011 |
| Major leaf vein density                                       | leaf_major_vein_density        | trait_0013012 |
| Length of all minor and major leaf lamina veins per unit area | leaf_total_vein_density        | trait_0013013 |
| Leaf vein frequency                                           | leaf_vein_frequency            | trait_0013014 |
| Stem xylem vessel density                                     | stem_vessel_density            | trait_0013111 |
| Leaf xylem vessel density                                     | leaf_vessel_density            | trait_0013112 |
| Stem xylem vessel diameter                                    | stem_vessel_diameter           | trait_0013113 |
| Stem xylem vessel hydraulic mean diameter                     | stem_vessel_diameter_hydraulic | trait_0013114 |
| Leaf xylem vessel diameter                                    | leaf_vessel_diameter           | trait_0013115 |
| Stem xylem vessel lumen fraction                              | stem_vessel_lumen_fraction     | trait_0013116 |
| Stem xylem vessel multiple fraction                           | stem_vessel_multiple_fraction  | trait_0013117 |
| Stem non-lumen fraction                                       | stem_vessel_non_lumen_fraction | trait_0013118 |
| xylem vessel wall fraction                                    | stem_vessel_wall_fraction      | trait_0013119 |

|                                                                                                                        |                                                                             |               |
|------------------------------------------------------------------------------------------------------------------------|-----------------------------------------------------------------------------|---------------|
| Xylem vulnerability index                                                                                              | stem_xylem_vulnerability_index                                              | trait_0013120 |
| Wood axial parenchyma fraction                                                                                         | wood_axial_parenchyma_fraction                                              | trait_0013161 |
| Wood conduit fraction                                                                                                  | wood_conduit_fraction                                                       | trait_0013162 |
| Wood fibre fraction                                                                                                    | wood_fibre_fraction                                                         | trait_0013163 |
| Wood ray parenchyma fraction                                                                                           | wood_ray_parenchyma_fraction                                                | trait_0013164 |
| Wood tracheid fraction                                                                                                 | wood_tracheid_fraction                                                      | trait_0013165 |
| Leaf work to punch                                                                                                     | leaf_work_to_punch                                                          | trait_0014011 |
| Leaf specific work to punch                                                                                            | leaf_work_to_punch_adjusted                                                 | trait_0014012 |
| Leaf work to shear                                                                                                     | leaf_work_to_shear                                                          | trait_0014013 |
| Leaf specific work to shear (fracture toughness)                                                                       | leaf_work_to_shear_adjusted                                                 | trait_0014014 |
| Leaf work to tear                                                                                                      | leaf_work_to_tear                                                           | trait_0014015 |
| Leaf specific work to tear                                                                                             | leaf_work_to_tear_adjusted                                                  | trait_0014016 |
| Bark modulus of elasticity                                                                                             | bark_modulus_of_elasticity                                                  | trait_0014017 |
| Stem modulus of elasticity                                                                                             | stem_modulus_of_elasticity                                                  | trait_0014018 |
| Xylem modulus of elasticity                                                                                            | xylem_modulus_of_elasticity                                                 | trait_0014019 |
| Modulus of rupture                                                                                                     | modulus_of_rupture                                                          | trait_0014020 |
| <b>Biological Process Trait (Physiological Process Trait)</b>                                                          |                                                                             |               |
| Plant photosynthetic pathway                                                                                           | photosynthetic_pathway                                                      | trait_0020221 |
| Bark photosynthesis                                                                                                    | bark_photosynthetic_status                                                  | trait_0020222 |
| Leaf photosynthesis rate per unit leaf area under ambient light and CO <sub>2</sub> (A)                                | leaf_photosynthetic_rate_per_area_ambient                                   | trait_0020240 |
| Leaf photosynthesis rate per unit leaf area under saturating light and CO <sub>2</sub> (A <sub>max</sub> )             | leaf_photosynthetic_rate_per_area_maximum                                   | trait_0020241 |
| Leaf photosynthesis rate per unit leaf area under saturating light and ambient CO <sub>2</sub> (A <sub>sat</sub> )     | leaf_photosynthetic_rate_per_area_saturated                                 | trait_0020242 |
| Leaf photosynthesis rate per unit leaf dry mass under ambient light and CO <sub>2</sub> (A)                            | leaf_photosynthetic_rate_per_dry_mass_ambient                               | trait_0020243 |
| Leaf photosynthesis rate per unit leaf dry mass under saturating light and CO <sub>2</sub> (A <sub>max</sub> )         | leaf_photosynthetic_rate_per_dry_mass_maximum                               | trait_0020244 |
| Leaf photosynthesis rate per unit leaf dry mass under saturating light and ambient CO <sub>2</sub> (A <sub>sat</sub> ) | leaf_photosynthetic_rate_per_dry_mass_saturated                             | trait_0020245 |
| Leaf internal CO <sub>2</sub> concentration during A <sub>max</sub> measurement (ci)                                   | leaf_intercellular_CO2_concentration_at_Amax                                | trait_0020310 |
| Internal CO <sub>2</sub> concentration during A <sub>sat</sub> measurement (ci)                                        | leaf_intercellular_CO2_concentration_at_Asat                                | trait_0020311 |
| Internal CO <sub>2</sub> concentration under ambient conditions (ci)                                                   | leaf_intercellular_CO2_concentration_at_Aambient                            | trait_0020312 |
| Ratio of internal to external CO <sub>2</sub> concentrations (ci/ca)                                                   | leaf_intercellular_CO2_concentration_to_atmospheric_CO2_concentration_ratio | trait_0020313 |
| CO <sub>2</sub> concentration inside chloroplasts (cc)                                                                 | leaf_chloroplast_CO2_concentration                                          | trait_0020314 |
| Ambient CO <sub>2</sub> concentration (ca)                                                                             | atmospheric_CO2_concentration                                               | trait_0020315 |
| Leaf J <sub>max</sub> per unit leaf area (J <sub>max</sub> )                                                           | leaf_photosynthesis_Jmax_per_area                                           | trait_0020410 |
| Leaf J <sub>max</sub> per unit leaf area at 25 deg C (J <sub>max</sub> 25)                                             | leaf_photosynthesis_Jmax_per_area_25C                                       | trait_0020411 |
| Leaf J <sub>max</sub> per unit leaf mass (J <sub>max</sub> )                                                           | leaf_photosynthesis_Jmax_per_mass                                           | trait_0020412 |
| Leaf V <sub>cmax</sub> per unit leaf area (V <sub>cmax</sub> )                                                         | leaf_photosynthesis_Vcmax_per_area                                          | trait_0020413 |



|                                                                                             |                                                         |               |
|---------------------------------------------------------------------------------------------|---------------------------------------------------------|---------------|
| Leaf Vcmax per unit leaf area at 25 deg C (Vcmax25)                                         | leaf_photosynthesis_Vcmax_per_area_25C                  | trait_0020414 |
| Leaf Vcmax per unit leaf mass (Vcmax)                                                       | leaf_photosynthesis_Vcmax_per_mass                      | trait_0020415 |
| Leaf Jmax to leaf Vcmax ratio at 25 deg C                                                   | leaf_photosynthesis_Jmax_over_Vcmax_25C                 | trait_0020416 |
| Leaf maximum quantum yield (Fv/Fm)                                                          | leaf_fluorescence_fv_over_fm                            | trait_0020417 |
| Leaf ambient quantum yield                                                                  | leaf_fluorescence_quantum_yield                         | trait_0020418 |
| Leaf quantum yield, gas exchange measurement                                                | leaf_gas_exchange_quantum_yield                         | trait_0020419 |
| Leaf respiration rate per unit leaf area, in the dark (Rdark)                               | leaf_dark_respiration_per_area                          | trait_0020510 |
| Leaf respiration rate per unit leaf dry mass, in the dark (Rdark)                           | leaf_dark_respiration_per_dry_mass                      | trait_0020511 |
| Leaf respiration rate per unit leaf area, in the light (Rday)                               | leaf_light_respiration_per_area                         | trait_0020512 |
| Stem respiration rate per unit stem area, in the dark                                       | stem_dark_respiration_per_area                          | trait_0020513 |
| Leaf stomatal conductance to water vapour per unit leaf area under ambient conditions (gsw) | leaf_stomatal_conductance_per_area_ambient              | trait_0020610 |
| Leaf stomatal conductance to water vapour per unit leaf area during Amax measurement (gsw)  | leaf_stomatal_conductance_per_area_at_Amax              | trait_0020611 |
| Leaf stomatal conductance to water vapour per unit leaf area during Asat measurement (gsw)  | leaf_stomatal_conductance_per_area_at_Asat              | trait_0020612 |
| Leaf stomatal water vapour resistance under ambient conditions                              | leaf_stomatal_resistance_ambient                        | trait_0020630 |
| Leaf mesophyll conductance to carbon dioxide per unit leaf area (gm)                        | leaf_mesophyll_conductance_per_area                     | trait_0020640 |
| Leaf mesophyll conductance to carbon dioxide per unit leaf mass (gm)                        | leaf_mesophyll_conductance_per_mass                     | trait_0020641 |
| Leaf transpiration per unit leaf area under ambient conditions (E)                          | leaf_transpiration_per_area_ambient                     | trait_0020660 |
| Leaf transpiration per unit leaf area during Amax measurement (E)                           | leaf_transpiration_per_area_at_Amax                     | trait_0020661 |
| Leaf transpiration per unit leaf area during Asat measurement (E)                           | leaf_transpiration_per_area_at_Asat                     | trait_0020662 |
| Leaf transpiration rate per unit leaf area, in the dark                                     | leaf_dark_transpiration_per_area                        | trait_0020663 |
| Integrated plant transpiration                                                              | integrated_plant_transpiration                          | trait_0020664 |
| Whole plant sapflow                                                                         | whole_plant_sapflow                                     | trait_0020665 |
| Leaf photosynthetic nitrogen use efficiency during Amax measurement (PNUE)                  | leaf_photosynthetic_nitrogen_use_efficiency_maximum     | trait_0020710 |
| Leaf photosynthetic nitrogen use efficiency during Asat measurement (PNUE)                  | leaf_photosynthetic_nitrogen_use_efficiency_saturated   | trait_0020711 |
| Leaf photosynthetic phosphorus use efficiency during Amax measurement (PPUE)                | leaf_photosynthetic_phosphorus_use_efficiency_maximum   | trait_0020712 |
| Leaf photosynthetic phosphorus use efficiency during Asat measurement (PPUE)                | leaf_photosynthetic_phosphorus_use_efficiency_saturated | trait_0020713 |
| Integrated water use efficiency                                                             | leaf_water_use_efficiency_integrated                    | trait_0020760 |
| Intrinsic water use efficiency (WUEi)                                                       | leaf_water_use_efficiency_intrinsic                     | trait_0020761 |
| Instantaneous water use efficiency (WUE)                                                    | leaf_water_use_efficiency_instantaneous                 | trait_0020762 |
| Stem hydraulic conductivity (Kh)                                                            | stem_hydraulic_conductivity                             | trait_0021013 |
| Sapwood specific hydraulic conductivity (Ks)                                                | sapwood_specific_hydraulic_conductivity                 | trait_0021014 |
| Theoretical sapwood specific hydraulic conductivity (Ks)                                    | sapwood_specific_hydraulic_conductivity_theoretical     | trait_0021015 |

|                                                                 |                                                            |               |
|-----------------------------------------------------------------|------------------------------------------------------------|---------------|
| Stem specific hydraulic conductivity (Ks)                       | stem_specific_hydraulic_conductivity                       | trait_0021016 |
| Leaf specific hydraulic conductance (kleaf)                     | leaf_specific_hydraulic_conductance                        | trait_0021017 |
| Leaf specific hydraulic conductivity (KI)                       | leaf_specific_hydraulic_conductivity                       | trait_0021018 |
| Root hydraulic conductivity (Kh)                                | root_hydraulic_conductivity                                | trait_0021021 |
| Root specific hydraulic conductivity                            | root_specific_hydraulic_conductivity                       | trait_0021022 |
| Pre-dawn water potential                                        | water_potential_predawn                                    | trait_0021030 |
| Midday water potential                                          | water_potential_midday                                     | trait_0021031 |
| Stem sapwood capacitance (C)                                    | stem_sapwood_capacitance                                   | trait_0021032 |
| Leaf capacitance (Cleaf)                                        | leaf_capacitance                                           | trait_0021033 |
| Root sapwood capacitance (C)                                    | root_sapwood_capacitance                                   | trait_0021034 |
| Leaf xylem pressure, 50% lost conductance                       | leaf_hydraulic_vulnerability                               | trait_0021050 |
| Stem xylem pressure, 12% lost conductivity                      | water_potential_12percent_lost_conductivity                | trait_0021051 |
| Stem xylem pressure, 50% lost conductivity                      | water_potential_50percent_lost_conductivity                | trait_0021052 |
| Stem xylem pressure, 88% lost conductivity                      | water_potential_88percent_lost_conductivity                | trait_0021053 |
| Hydraulic safety margin, 50%                                    | hydraulic_safety_margin_50                                 | trait_0021054 |
| Hydraulic safety margin, 88%                                    | hydraulic_safety_margin_88                                 | trait_0021055 |
| Leaf turgor loss point                                          | leaf_turgor_loss_point                                     | trait_0021056 |
| Osmotic potential                                               | osmotic_potential                                          | trait_0021057 |
| Osmotic potential at full turgor                                | osmotic_potential_at_full_turgor                           | trait_0021058 |
| Bulk modulus of elasticity (e)                                  | bulk_modulus_of_elasticity                                 | trait_0021059 |
| Leaf relative water content predawn                             | leaf_relative_water_content_predawn                        | trait_0021060 |
| Leaf relative water content at turgor loss point                | leaf_relative_water_content_at_turgor_loss_point           | trait_0021061 |
| Root xylem pressure, 50% lost conductivity                      | root_water_potential_50percent_lost_conductivity           | trait_0021062 |
| Photochemical reflectance index (PRI)                           | leaf_photochemical_reflectance_index                       | trait_0020813 |
| Water band index                                                | leaf_water_band_index                                      | trait_0020814 |
| Modified normalized difference vegetation index (modified NDVI) | modified_NDVI                                              | trait_0020815 |
| Modified chlorophyll absorption ratio index 705                 | leaf_chlorophyll_index_modified_ND705                      | trait_0020816 |
| <b>Life History Trait</b>                                       |                                                            |               |
| Plant growth form                                               | plant_growth_form                                          | trait_0030010 |
| Life form                                                       | life_form                                                  | trait_0030011 |
| Life history                                                    | life_history                                               | trait_0030012 |
| Ephemeral life history class                                    | life_history_ephemeral_class                               | trait_0030013 |
| Lifespan                                                        | lifespan                                                   | trait_0030014 |
| Plant growth substrate                                          | plant_growth_substrate                                     | trait_0030015 |
| Plant photosynthetic organ                                      | plant_photosynthetic_organ                                 | trait_0030016 |
| Plant alternative energy and nutrient acquisition strategies    | plant_alternative_energy_and_nutrient_acquisition_strategy | trait_0030017 |
| Woodiness                                                       | woodiness                                                  | trait_0030018 |
| Detailed woodiness categories                                   | woodiness_detailed                                         | trait_0030019 |
| Physical defence structures                                     | plant_physical_defence_structures                          | trait_0030020 |

|                                                              |                                             |               |
|--------------------------------------------------------------|---------------------------------------------|---------------|
| Plant climbing mechanisms                                    | plant_climbing_mechanism                    | trait_0030021 |
| Plant succulence                                             | plant_succulence                            | trait_0030022 |
| Stem growth habit                                            | stem_growth_habit                           | trait_0030023 |
| Leaf phenology                                               | leaf_phenology                              | trait_0030024 |
| Leaf lifespan                                                | leaf_lifespan                               | trait_0030025 |
| Competitive stratum                                          | competitive_stratum                         | trait_0030026 |
| Plant nitrogen fixation capacity                             | nitrogen_fixing                             | trait_0030027 |
| Plant root structures                                        | root_structure                              | trait_0030028 |
| Plant parasitism status                                      | parasitic                                   | trait_0030029 |
| Plant sex type                                               | sex_type                                    | trait_0030060 |
| Pollination syndrome                                         | pollination_syndrome                        | trait_0030061 |
| Pollination system                                           | pollination_system                          | trait_0030062 |
| Plant genome size                                            | genome_size                                 | trait_0030080 |
| Chromosome ploidy                                            | ploidy                                      | trait_0030081 |
| Age of reproductive maturity                                 | reproductive_maturity                       | trait_0030210 |
| Diaspore dispersal syndrome                                  | dispersal_syndrome                          | trait_0030211 |
| Diaspore dispersal agents                                    | dispersers                                  | trait_0030212 |
| Environmental flowering cues                                 | flowering_cues                              | trait_0030213 |
| Flowering time, by month                                     | flowering_time                              | trait_0030214 |
| Fruiting time, by month                                      | fruiting_time                               | trait_0030215 |
| Seedling recruitment time, by month                          | recruitment_time                            | trait_0030216 |
| Seedling establishment conditions                            | seedling_establishment_conditions           | trait_0030217 |
| Canopy light environment required for reproduction           | reproductive_light_environment_index        | trait_0030218 |
| Canopy light environment required for seedling establishment | establishment_light_environment_index       | trait_0030219 |
| Seed storage location                                        | seedbank_location                           | trait_0030411 |
| Serotiny                                                     | serotiny                                    | trait_0030412 |
| Seedbank longevity class                                     | seedbank_longevity_class                    | trait_0030413 |
| Seedbank longevity                                           | seedbank_longevity                          | trait_0030414 |
| Dormancy type                                                | seed_dormancy_class                         | trait_0030415 |
| Seed germination treatment                                   | seed_germination_treatment                  | trait_0030416 |
| Seed germination proportion                                  | seed_germination                            | trait_0030417 |
| Seed viability                                               | seed_viability                              | trait_0030418 |
| Seed germination time                                        | seed_germination_time                       | trait_0030419 |
| Vegetative reproduction ability                              | vegetative_reproduction_ability             | trait_0030510 |
| Clonal spread mechanism                                      | clonal_spread_mechanism                     | trait_0030511 |
| Storage organ                                                | storage_organ                               | trait_0030512 |
| Bud bank location                                            | bud_bank_location                           | trait_0030513 |
| Sprout depth                                                 | sprout_depth                                | trait_0030514 |
| Post-fire resprouting capacity                               | resprouting_capacity                        | trait_0030610 |
| Post-fire proportion resprouting individuals                 | resprouting_capacity_proportion_individuals | trait_0030611 |
| Post-fire resprouting capacity of juvenile plants            | resprouting_capacity_juvenile               | trait_0030612 |

|                                                                 |                                             |               |
|-----------------------------------------------------------------|---------------------------------------------|---------------|
| Time from seedling germination until individuals survive a fire | resprouting_capacity_time_from_germination  | trait_0030613 |
| Post-fire to pre-fire stem ratio                                | resprouting_capacity_stem_ratio             | trait_0030614 |
| Plant vegetative response to disturbances other than fire       | resprouting_capacity_non_fire_disturbance   | trait_0030615 |
| Fire exposure level                                             | fire_exposure_level                         | trait_0030651 |
| Post-fire recruitment                                           | post_fire_recruitment                       | trait_0030652 |
| Post-fire flowering                                             | post_fire_flowering                         | trait_0030653 |
| Time from fire to first flowering                               | fire_time_from_fire_to_flowering            | trait_0030654 |
| Time from fire until 50% of individuals are flowering           | fire_time_from_fire_to_50_percent_flowering | trait_0030655 |
| Time from fire to peak flowering                                | fire_time_from_fire_to_peak_flowering       | trait_0030656 |
| Time from fire until flowering declines                         | fire_time_from_fire_to_flowering_decline    | trait_0030657 |
| Time from fire to fruiting                                      | fire_time_from_fire_to_fruiting             | trait_0030658 |
| Time from fire until 50% of individuals are fruiting            | fire_time_from_fire_to_50_percent_fruiting  | trait_0030659 |
| Fuel bed bulk density                                           | fire_fuel_bed_bulk_density                  | trait_0030710 |
| Fuel consumption by fire                                        | fire_fuel_consumption                       | trait_0030711 |
| Fire rate of spread                                             | fire_rate_of_spread                         | trait_0030712 |
| Leaf smoulder duration                                          | fire_smoulder_duration                      | trait_0030713 |
| Leaf flame duration                                             | fire_flame_duration                         | trait_0030714 |
| Leaf flame and smoulder duration                                | fire_total_burn_duration                    | trait_0030715 |
| Fire time to ignition                                           | fire_time_to_ignition                       | trait_0030716 |
| Plant resource requirements and tolerance                       | plant_type_by_resource_use                  | trait_0030810 |
| Plant flood regime response                                     | plant_flood_regime_classification           | trait_0030811 |
| Plant water-logging tolerance                                   | plant_tolerance_water_logged_soils          | trait_0030812 |
| Plant inundation tolerance                                      | plant_tolerance_inundation                  | trait_0030813 |
| Plant snow tolerance                                            | plant_tolerance_snow                        | trait_0030814 |
| Plant soil salinity tolerance                                   | plant_tolerance_soil_salinity               | trait_0030815 |
| Plant salt tolerance strategy                                   | plant_tolerance_salt                        | trait_0030816 |
| Plant calcium sensitivity                                       | plant_tolerance_calcicole                   | trait_0030817 |
| Plant fire tolerance strategy                                   | plant_tolerance_fire                        | trait_0030818 |

710

711 **Supplementary Table 4.** Columns in the data table APD\_traits.csv

| <b>Column(s)</b>                                                             | <b>Description</b>                                                                                                                              |
|------------------------------------------------------------------------------|-------------------------------------------------------------------------------------------------------------------------------------------------|
| identifier                                                                   | IRI for trait within APD schema                                                                                                                 |
| trait                                                                        | Alternate label for trait within APD schema                                                                                                     |
| label                                                                        | Label for trait within APD schema                                                                                                               |
| description_encoded                                                          | Description of trait, with key words linked to terms from published vocabularies/ontologies                                                     |
| description                                                                  | Description of trait                                                                                                                            |
| comments                                                                     | Additional comments about the trait, including possible sources of error, related traits, or best-practise methodologies                        |
| inScheme                                                                     | Indication that this term is within the ADP schema                                                                                              |
| type                                                                         | Indicating whether this is a categorical or numeric trait, by linking to the appropriate term within the STATO ontology                         |
| type_x                                                                       | String indicating whether this is a categorical or numeric trait                                                                                |
| min                                                                          | For numeric traits, the minimum allowable value                                                                                                 |
| max                                                                          | For numeric traits, the maximum allowable value                                                                                                 |
| units                                                                        | For numeric traits, the standard units for this trait within APD                                                                                |
| units_UCUM                                                                   | For numeric traits, the UCUM syntax for the standard units                                                                                      |
| units_uom                                                                    | For numeric traits, the units of measurement syntax for the standard units                                                                      |
| category_1, category_2, category_3, category_4                               | Up to four columns indicating hierarchical categories into which the trait is mapped                                                            |
| created                                                                      | Date the trait was first created                                                                                                                |
| modified                                                                     | Date the trait was most recently modified                                                                                                       |
| deprecated_trait_name                                                        | Previous labels used for this trait concept                                                                                                     |
| constraints                                                                  | The scope of the trait, indicating taxonomic groups for which the trait is used or if the trait only applies to taxa with specific morphologies |
| structure_1, structure_2, structure_3, structure_4                           | Up to four columns indicating the plant structure (a tissue, organ, or the whole plant) that is measured by this trait                          |
| meas_char_1, meas_char_2, meas_char_3, meas_char_4, meas_char_5, meas_char_6 | Up to six columns indicating the characteristic that is measured, such as whether the trait records `mass`, `shape`, `length`, etc.             |

|                                                                                                                           |                                                                                                                                |
|---------------------------------------------------------------------------------------------------------------------------|--------------------------------------------------------------------------------------------------------------------------------|
| rev_01, rev_02, rev_03, rev_04,<br>rev_05, rev_06, rev_07, rev_08,<br>rev_09, rev_10                                      | Up to ten columns indicating people who have reviewed this trait concept                                                       |
| ref_1, ref_2, ref_3, ref_4, ref_5                                                                                         | Up to five columns indicating references linked to this trait concept                                                          |
| keyword_1, keyword_2,<br>keyword_3, keyword_4,<br>keyword_5, keyword_6,<br>keyword_7, keyword_8,<br>keyword_9, keyword_10 | Up to ten columns indicating keywords linked to this trait concept; the keywords are generally terms in published vocabularies |
| exact_other1, close_other1,<br>close_other2, related_other                                                                | Formally published vocabularies/ontologies with traits that are identical, similar, or related to this trait concept.          |
| exact_TOP, close_TOP,<br>related_TOP, related_TOP2                                                                        | Traits within the TOP Trait Thesaurus that are identical, similar, or related to this trait concept.                           |
| exact_TRY, close_TRY,<br>related_TRY                                                                                      | Traits within the TRY Plant Trait Database that are identical, similar, or related to this trait concept.                      |
| exact_LEDA, close_LEDA,<br>related_LEDA                                                                                   | Traits within the LEDA Database that are identical, similar, or related to this trait concept.                                 |
| exact_GIFT, close_GIFT,<br>related_GIFT                                                                                   | Traits within the GIFT Database that are identical, similar, or related to this trait concept.                                 |
| exact_BIEN, close_BIEN,<br>related_BIEN                                                                                   | Traits within the BIEN Database that are identical, similar, or related to this trait concept.                                 |
| exact_BROT, close_BROT,<br>related_BROT                                                                                   | Traits within the BROT Database that are identical, similar, or related to this trait concept.                                 |
| PalmTraits_exact,<br>PalmTraits_close                                                                                     | Traits within the PalmTraits Database that are identical or similar to this trait concept.                                     |

712

713

714

715 **Supplementary Table 5.** Columns in the data table APD\_references.csv

| <b>Column</b> | <b>Description</b>                                                                                     | <b>Annotation Property*</b>   |
|---------------|--------------------------------------------------------------------------------------------------------|-------------------------------|
| Entity        | URL for reference, if available                                                                        |                               |
| label         | Author-year label for reference                                                                        | skos:label                    |
| citation      | Full reference citation                                                                                | dcterms:bibliographicCitation |
| identifier    | Identifier for reference, a DOI when available, or otherwise an ISBN (for books) or URL (for websites) | dcterms:identifier            |
| title         | The title of the reference                                                                             | dcterms:title                 |

716 \* See Table 3 footnotes for the full schema URL's associated with each annotation property  
717 prefix.

718

719

720 **Supplementary Table 6.** Columns in the data table APD\_reviewers.csv

| Column | Description                          | Annotation Property*               |
|--------|--------------------------------------|------------------------------------|
| Entity | URL for the reviewer's ORCID profile |                                    |
| label  | Reviewer's full name                 | skos:label                         |
| ORCID  | Reviewer's ORCID number              | obo:IAO_0000708 (ORCID identifier) |

721 \* See Table 3 footnotes for the full schema URL's associated with each annotation property  
722 prefix.

723

724



725 **Supplementary Table 7.** Columns in the data table APD\_units.csv

| Column      | Description                                                                               | Annotation Property* |
|-------------|-------------------------------------------------------------------------------------------|----------------------|
| Entity      | Units of Measurement IRI for the specific units of measurement                            |                      |
| label       | Label for these units of measurement                                                      | skos:label           |
| altLabel    | Alternative written label for these units of measurement                                  | skos:altLabel        |
| description | Verbal description of these units of measurement                                          | dcterms:description  |
| SI_code     | The International System of Units code for these units of measurement                     | uom:SI_code          |
| UCUM_code   | The Unified Code for Units of Measure code for these units of measurement                 | uom:UCUM_code        |
| exactMatch  | Up to 6 columns indicating exact matches for this unit of measurement in other ontologies | skos:exactMatch      |

726 \* See Table 3 footnotes for the full schema URL's associated with each annotation property  
 727 prefix.

728

729

730 **Supplementary Table 8.** Columns in the data table published\_classes.csv

| Column      | Description                                             | Annotation Property* |
|-------------|---------------------------------------------------------|----------------------|
| Entity      | URI for a specific term (class) in a published ontology |                      |
| label       | Label for the term                                      | skos:label           |
| description | Verbal description of the term                          | dcterms:description  |
| identifier  | Identifier for the term within a specific vocabulary    | dcterms:identifier   |
| inScheme    | URI for the vocabulary in which the term is published   | skos:inScheme        |
| prefix      | Prefix for the specific vocabulary                      | (Not used)           |
| vocabulary  | Name of the specific vocabulary                         | (Not used)           |

731 \* See Table 3 footnotes for the full schema URL's associated with each annotation property  
732 prefix.

733

734

735 **Supplementary Table 9.** Columns in the data table APD\_categorical\_values.csv

| Column      | Description                                                  | Annotation Property* |
|-------------|--------------------------------------------------------------|----------------------|
| identifier  | Identifier for a specific categorical trait value within APD | dcterms:identifier   |
| label       | Label for the categorical trait value                        | skos:label           |
| description | Description of the categorical trait value                   | dcterms:description  |
| trait_name  | Trait name to which the categorical trait value refers       | skos:broader         |

736 \* See Table 3 footnotes for the full schema URL's associated with each annotation property  
737 prefix.

738

739

740 **Supplementary Table 10.** Columns in the data table APD\_trait\_hierarchy.csv

| Column      | Description                                                                    | Annotation Property* |
|-------------|--------------------------------------------------------------------------------|----------------------|
| Entity      | URI for a trait category (hierarchical level) within APD                       |                      |
| label       | Label for a trait category (hierarchical level) within APD                     | skos:label           |
| description | Description of a trait category (hierarchical level) within APD                | dcterms:description  |
| Parent      | Superclass (higher hierarchical level) for a trait category within APD         | skos:broader         |
| exactMatch  | Link to identical concept in a published ontology                              | skos:exactMatch      |
| tier_1      | Highest hierarchical level into which the category fits                        | (Not used)           |
| tier_2      | Second highest hierarchical level into which the category fits                 | (Not used)           |
| tier_3      | Third highest hierarchical level into which the category fits (if applicable)  | (Not used)           |
| tier_4      | Fourth highest hierarchical level into which the category fits (if applicable) | (Not used)           |
| hierarchy   | Written string indicating the full hierarchy of the specific category          | (Not used)           |

741 \* See Table 3 footnotes for the full schema URL's associated with each annotation property  
742 prefix.

743

744

745 **Supplementary Table 11.** Columns in the data table APD\_glossary.csv

| <b>Column</b> | <b>Description</b>                                          | <b>Annotation Property*</b> |
|---------------|-------------------------------------------------------------|-----------------------------|
| identifier    | Identifier for a specific glossary term within APD/glossary | dcterms:identifier          |
| label         | Label for the glossary term                                 | skos:label                  |
| description   | Description of the glossary term                            | dcterms:description         |

746 \* See Table 3 footnotes for the full schema URL's associated with each annotation property  
747 prefix.

748

749

750 **Supplementary Table 12.** Columns in the data table APD\_annotation\_properties.csv

| Column      | Description                                                                              | Annotation Property* |
|-------------|------------------------------------------------------------------------------------------|----------------------|
| Entity      | URI for annotation properties used by the APD                                            |                      |
| label       | Label for annotation properties used by the APD, from its own vocabulary                 | skos:label           |
| description | Description of annotation properties used by the APD, from its own vocabulary            | dcterms:description  |
| issued      | Date a term was issued within its vocabulary                                             | dcterms:issued       |
| comment     | Additional comments about annotation properties used by the APD, from its own vocabulary | rdfs:comment         |
| isDefinedBy | URI for the vocabulary in which the term is published                                    | rdfs:isDefinedBy     |
| inScheme    | URI for the vocabulary in which the term is published                                    | skos:inScheme        |

751 \* See Table 3 footnotes for the full schema URL's associated with each annotation property  
 752 prefix.

753

754

755 **Supplementary Table 13.** Columns in the data table APD\_namespace\_declaration.csv

| Column | Description                                                                       | Annotation Property* |
|--------|-----------------------------------------------------------------------------------|----------------------|
| prefix | Prefix used for a specific vocabulary within APD machine-readable representations |                      |
| Scheme | URI for each vocabulary used in the APD                                           | skos:inScheme        |

756 \* See Table 3 footnotes for the full schema URL's associated with each annotation property  
757 prefix.

758

759

760 **Supplementary Table 14.** Columns in the data table APD\_resource.csv

| Column    | Description                                                  |
|-----------|--------------------------------------------------------------|
| Subject   | Entity URI for the APD schema                                |
| Predicate | Annotation properties for the APD schema                     |
| Object    | Value of a particular annotation property for the APD schema |

761

762

763



764

## 765 **References**

- 766 1. Scheiter, S., Langan, L. & Higgins, S. I. Next-generation dynamic global vegetation  
767 models: learning from community ecology. *New Phytol.* **198**, 957–969 (2013).
- 768 2. Gallagher, R. V. *et al.* A guide to using species trait data in conservation. *One Earth* **4**,  
769 927–936 (2021).
- 770 3. Garnier, E., Navas, M.-L. & Grigulis, K. Trait-based ecology: definitions, methods, and a  
771 conceptual framework. in *Plant Functional Diversity: Organism traits, community*  
772 *structure, and ecosystem properties* (eds. Garnier, E., Navas, M.-L. & Grigulis, K.) 0  
773 (Oxford University Press, 2015). doi:10.1093/acprof:oso/9780198757368.003.0002.
- 774 4. De Queiroz, K. Species Concepts and Species Delimitation. *Syst. Biol.* **56**, 879–886 (2007).
- 775 5. Gallagher, R. V. *et al.* Open Science principles for accelerating trait-based science across  
776 the Tree of Life. *Nat. Ecol. Evol.* **4**, 294–303 (2020).
- 777 6. Kattge, J. *et al.* TRY plant trait database – enhanced coverage and open access. *Glob.*  
778 *Change Biol.* **26**, 119–188 (2020).
- 779 7. Weigelt, P., König, C. & Kreft, H. GIFT – A Global Inventory of Floras and Traits for  
780 macroecology and biogeography. *J. Biogeogr.* **47**, 16–43 (2020).
- 781 8. Enquist, B. J., Condit, R., Peet, R. K., Schildhauer, M. & Thiers, B. M. *Cyberinfrastructure*  
782 *for an integrated botanical information network to investigate the ecological impacts of*  
783 *global climate change on plant biodiversity*. <https://peerj.com/preprints/2615> (2016)  
784 doi:10.7287/peerj.preprints.2615v2.
- 785 9. Wang, H. *et al.* The China plant trait database version 2. *Sci. Data* **9**, 769 (2022).
- 786 10. Tavşanoğlu, Ç. & Pausas, J. G. A functional trait database for Mediterranean Basin plants.  
787 *Sci. Data* **5**, 180135 (2018).

- 788 11. Falster, D. *et al.* AusTraits, a curated plant trait database for the Australian flora. *Sci.*  
789 *Data* **8**, 254 (2021).
- 790 12. Báez, S. *et al.* FunAndes – A functional trait database of Andean plants. *Sci. Data* **9**, 511  
791 (2022).
- 792 13. Kissling, W. D. *et al.* PalmTraits 1.0, a species-level functional trait database of palms  
793 worldwide. *Sci. Data* **6**, 178 (2019).
- 794 14. Klimešová, J. *et al.* Handbook of standardized protocols for collecting plant modularity  
795 traits. *Perspect. Plant Ecol. Evol. Syst.* **40**, 125485 (2019).
- 796 15. WFO. The World Flora Online (WFO). <http://www.worldfloraonline.org/> (2023).
- 797 16. Díaz, S. *et al.* The global spectrum of plant form and function. *Nature* **529**, 167–171  
798 (2016).
- 799 17. Garnier, E. *et al.* Towards a thesaurus of plant characteristics: an ecological contribution.  
800 *J. Ecol.* **105**, 298–309 (2017).
- 801 18. Raunkiaer, C., Egerton, F. N. & Fausboll. *The life forms of plants and statistical plant*  
802 *geography*. (Clarendon Press, 1934).
- 803 19. Beentje, H. *The Kew Plant Glossary: An Illustrated Dictionary of Plant Terms*. (Kew  
804 Publishing, 2016).
- 805 20. Simpson, M. G. *Plant Systematics*. (Elsevier, 2019).
- 806 21. Cornelissen, J. H. C. *et al.* A handbook of protocols for standardised and easy  
807 measurement of plant functional traits worldwide. *Aust. J. Bot.* **51**, 335 (2003).
- 808 22. Pérez-Harguindeguy, N. *et al.* New handbook for standardised measurement of plant  
809 functional traits worldwide. *Aust. J. Bot.* **61**, 167–234 (2013).

- 810 23. Saatkamp, A. *et al.* A research agenda for seed-trait functional ecology. *New Phytol.* **221**,  
811 1764–1775 (2019).
- 812 24. Wigley, B. J. *et al.* A handbook for the standardised sampling of plant functional traits in  
813 disturbance-prone ecosystems, with a focus on open ecosystems. *Aust. J. Bot.* **68**, 473–  
814 531 (2020).
- 815 25. Freschet, G. T. *et al.* A starting guide to root ecology: strengthening ecological concepts  
816 and standardising root classification, sampling, processing and trait measurements. *New*  
817 *Phytol.* **232**, 973–1122 (2021).
- 818 26. Ely, K. S. *et al.* A reporting format for leaf-level gas exchange data and metadata. *Ecol.*  
819 *Inform.* **61**, 101232 (2021).
- 820 27. Kleyer, M. *et al.* The LEDA Traitbase: a database of life-history traits of the Northwest  
821 European flora. *J. Ecol.* **96**, 1266–1274 (2008).
- 822 28. Sauquet, H. *et al.* The ancestral flower of angiosperms and its early diversification. *Nat.*  
823 *Commun.* **8**, 16047 (2017).
- 824 29. Lenters, T. P. *et al.* Integration and harmonization of trait data from plant individuals  
825 across heterogeneous sources. *Ecol. Inform.* **62**, 101206 (2021).
- 826 30. Arnaud, E. *et al.* Towards a reference Plant Trait Ontology for modeling knowledge of  
827 plant traits and phenotypes. in *Proceedings of the International Conference on*  
828 *Knowledge Engineering and Ontology Development (KEOD-2012)*, 220–225 (2012).  
829 doi:10.5220/0004138302200225.
- 830 31. Schentz, H., Peterseil, J. & Bertrand, N. EnvThes – interlinked thesaurus for long term  
831 ecological research, monitoring, and experiments. in *Proceedings of the 27th Conference*  
832 *on Environmental Informatics - Informatics for Environmental Protection, Sustainable*

- 833        *Development and Risk Management*. (Page, B., Fleischer, A. G., Göbel, J. & Wohlgemuth,  
834        V. (Hrsg.), 2013).
- 835    32. Schneider, F. D. *et al.* Towards an ecological trait-data standard. *Methods Ecol. Evol.* **10**,  
836        2006–2019 (2019).
- 837    33. Kattge, J. *et al.* A generic structure for plant trait databases. *Methods Ecol. Evol.* **2**, 202–  
838        213 (2011).
- 839    34. Madin, J. S. *et al.* The Coral Trait Database, a curated database of trait information for  
840        coral species from the global oceans. *Sci. Data* **3**, 160017 (2016).
- 841    35. Wilkinson, M. D. *et al.* The FAIR Guiding Principles for scientific data management and  
842        stewardship. *Sci. Data* **3**, 160018 (2016).
- 843    36. Riley, J. *Understanding Metadata: What is Metadata, and What is it For?: A Primer*.  
844        <https://www.niso.org/publications/understanding-metadata-2017> (2017).
- 845    37. Miles, A. & Bechhofer, S. SKOS Simple Knowledge Organization System Reference.  
846        <https://www.w3.org/TR/skos-reference/> (2009).
- 847    38. Brickley, D. & Guha, R. V. RDF Schema 1.1. *W3C. 1.1. RDF Working Group*  
848        <https://www.w3.org/TR/rdf-schema/> (2014).
- 849    39. DCMI Metadata Terms. [https://www.dublincore.org/specifications/dublin-core/dcmi-](https://www.dublincore.org/specifications/dublin-core/dcmi-terms/2010-10-11/)  
850        [terms/2010-10-11/](https://www.dublincore.org/specifications/dublin-core/dcmi-terms/2010-10-11/) (2010).
- 851    40. Schadow, G., McDonald, C. J., Suico, J. G., Föhring, U. & Tolxdorff, T. Units of Measure in  
852        Clinical Information Systems. *J. Am. Med. Inform. Assoc.* **6**, 151–162 (1999).
- 853    41. Dumontier, M. *et al.* The Semanticscience Integrated Ontology (SIO) for biomedical  
854        research and knowledge discovery. *J. Biomed. Semant.* **5**, 14 (2014).
- 855    42. Madin, J. S. *et al.* An ontology for describing and synthesizing ecological observation  
856        data. *Ecol. Inform.* **2**, 279–296 (2007).

- 857 43. DataCite Metadata Schema 4.4. *DataCite Schema*  
858 <https://schema.datacite.org/meta/kernel-4.4/> (2021).
- 859 44. Magagna, B. *et al.* The I-ADOPT Interoperability Framework: a proposal for FAIRer  
860 observable property descriptions. <https://w3id.org/iadopt/ont/0.9.1> (2021)  
861 doi:10.5194/egusphere-egu21-13155.
- 862 45. Boettiger, C. rdfliib: A high level wrapper around the redland package for common rdf  
863 applications (Version 0.1.0). (2023).
- 864 46. Spjut, R. W. A Systematic Treatment of Fruit Types. *The World Botanical Associates*  
865 [http://www.worldbotanical.com/fruit\\_types.htm](http://www.worldbotanical.com/fruit_types.htm) (2015).
- 866 47. Díaz, S. *et al.* The global spectrum of plant form and function: enhanced species-level  
867 trait dataset. *Sci. Data* **9**, 755 (2022).
- 868 48. Mayfield, E. *Illustrated Plant Glossary*. (CSIRO Publishing, 2021).
- 869 49. Harris, J. G. & Harris, M. W. *Plant Identification Terminology: An Illustrated Glossary*.  
870 (Spring Lake Pub., 2001).
- 871 50. Wäldchen, J., Wittich, H. C., Rzanny, M., Fritz, A. & Mäder, P. Towards more effective  
872 identification keys: A study of people identifying plant species characters. *People Nat.* **4**,  
873 1603–1615 (2022).
- 874 51. anonymous. Systematics Association Committee for Descriptive Biological Terminology,  
875 Ila. Terminology of Simple Symmetrical Plane Shapes (Chart 1a), Addendum. *Taxon* **11**,  
876 245–247 (1962).
- 877
